# Supplementary material for: Perceived Influence of Weather Conditions on Rheumatic Pain in Romania
Source: Hindawi journal article supplement (doi:10.1155/2019/9187105), 2019-06-10
Supplement: f1 [file 9187105.f1.zip]

Archive with 3 entries (3 files):
- 9187105.f1/SM_1_AMETE_2777777.doc
- 9187105.f1/SM_2_AMETE_2777778.xlsx
- 9187105.f1/SM_3_AMETE_2777779.xlsx
