# Supplementary material for: Perceived Influence of Weather Conditions on Rheumatic Pain in Romania
Source: Hindawi journal article supplement (doi:10.1155/2019/9187105), 2019-06-10
Supplement: f1 [file 9187105.f1.zip › 9187105.f1/SM_2_AMETE_2777778.xlsx]

## Sheet: Database_Tusnad
THE PERCEIVED INFLUENCE OF WEATHER CONDITIONS ON RHEUMATIC PAIN IN ROMANIA
Advances in Meteorology
Adina-Eliza Croitoru*, Gabriela Dogaru, Titus Cristian Man, Simona Mălăescu, Marieta Motricală, Andreea-Sabina Scripcă,
* Babeș-Bolyai University, Faculty of Geography: adina.croitoru@ubbcluj.ro; adina04@yahoo.com.
nrchest	Q01_1	Q01_2	Q01_3	Q01_4	Q01_5	Q02_vertebral_column	Q02_hips	Q02_knees	Q02_hands	Q02_other	Q03	Q04	Q05	Q06	Q07	Q08	Q09_bw	Q09_fw	Q10q1	Q10q2	Q10q3	Q10q4	Q11q1	Q11q2	Q11q3	Q11q4	Q11q5	Q11q6	Q11q7	Q11q8	Q11q9	Q11q10	Q11q11	Q11q12	Q11q13	Q12	Q13	Q14	Q15county	Q15city	Q15	Q16	Q17	Q18	Q19_alcohol_regularly	Q19_alcohol_occasional	Q19_ex_alcohol	Q19_coffee	Q19_tobacco
1	M16.0	M17.9	M15.0			0	1	1	0	0	20	1	4	4	4	4	4	0	3	0	0	3	3	3	1	3	1	1	3	1	1	1	3	3	1	2	3	3	Covasna	Sfantu Gheorghe	2	60	1	5	0	1	0	1	0
2	M47.90	M17.0				1	0	1	0	0	25	1	3	4	4	4	3	0	4	0	0	3	1	3	1	3	1	1	3	3	1	1	3	2	1	3	4	2	Harghita	Odorheiu Secuiesc	2	59	1	2	0	1	0	0	0
3	M16.0	M17.0				0	1	0	0	1	3	1	4	4	4	0	-	-	-	-	-	-	-	-	-	-	-	-	-	-	-	-	-	-	-	-	-	-	Maramures	Baia Mare	2	65	2	3	0	1	0	1	0
4	M16.3	M17.0				0	1	1	0	0	5	1	3	1	1	3	4	0	4	0	0	4	1	3	1	3	1	1	1	3	1	1	2	2	1	3	3	3	Maramures	Baia Mare	2	56	1	3	0	1	0	1	0
5	M47.92	M16.0	M17.1	M53.1		0	1	1	0	1	30	1	4	4	4	4	4	0	4	0	0	3	3	3	1	3	1	1	1	3	1	1	2	2	1	3	4	5	Mures	Targu Mures	2	70	1	3	0	1	0	1	0
6	M16.0	M17.0				1	0	1	0	0	20	1	4	4	4	4	4	0	4	0	0	2	3	3	1	3	1	1	2	3	1	1	2	2	1	2	4	2	Prahova	Valenii de Munte	2	76	1	4	0	0	0	1	0
7	M17.0	M47.92	M81.90			1	1	0	0	0	20	1	3	3	3	3	4	0	4	0	0	4	1	3	0	3	0	0	3	3	0	0	2	2	1	2	4	3	Dolj	Craiova	2	71	1	1	0	0	0	1	0
1	M54.4	M25.51				1	1	0	0	1	25	1	2	2	2	3	2	0	4	0	0	4	3	3	1	3	1	1	3	3	1	1	3	2	1	1	4	3	Covasna	Ghelenta	1	71	1	3	0	0	0	1	0
2	M16.0	M17.0				1	1	0	0	1	30	1	4	4	4	4	4	0	4	0	0	3	3	3	1	3	1	1	3	3	1	1	3	3	1	2	4	3	Satu Mare	Satu Mare	2	69	2	3	0	0	0	1	0
3	M16.0	M25.51	M17.9			1	1	1	0	1	15	1	3	3	3	0	-	-	-	-	-	-	-	-	-	-	-	-	-	-	-	-	-	-	-	-	-	-	Mures	Targu Mures	2	68	2	3	0	1	0	1	0
4	M16.0	M17.0	M81.90	M75.8		1	1	1	1	1	15	1	4	4	4	3	4	0	2	0	0	2	3	3	2	3	2	2	3	3	2	2	3	3	2	2	4	3	Dolj	Craiova	2	63	1	4	0	0	0	1	0
5	M47.90	M17.0				1	0	0	1	1	30	1	4	3	3	4	4	0	4	0	0	4	3	3	1	3	1	1	3	3	1	1	3	3	2	3	4	3	Buzau	Ramnicu Sarat	2	76	1	3	3	0	0	1	0
6	M54.4					1	1	1	0	1	20	1	4	4	4	3	3	0	4	0	0	4	3	3	1	3	1	1	3	3	1	1	3	3	3	3	4	3	Maramures	Ruscova	1	67	1	3	0	0	0	1	0
7	M79.08					0	0	1	1	0	20	1	4	3	3	4	3	1	3	0	0	2	3	3	1	1	1	1	3	1	1	1	1	1	1	3	1	2	Bucuresti	Bucuresti	2	68	1	3	0	1	0	1	0
8	M79.08					0	1	1	0	1	50	1	4	4	4	4	4	0	4	0	0	3	3	3	1	3	1	1	3	3	1	1	3	3	2	3	4	3	Bucuresti	Bucuresti	2	76	2	3	0	1	0	1	0
9	M79.08	M16.0				1	1	1	0	1	25	1	4	3	3	4	4	0	4	0	0	4	3	3	1	3	1	1	3	3	1	1	3	3	3	2	4	3	Harghita	Gheorgheni	2	63	2	3	0	1	0	1	0
10	M54.4					1	0	1	0	1	30	1	4	4	4	0	-	-	-	-	-	-	-	-	-	-	-	-	-	-	-	-	-	-	-	-	-	-	Constanta	Eforie Sud	2	64	1	3	0	0	0	1	0
11	M54.4	M17.0				0	0	1	0	1	30	1	3	2	2	1	3	0	4	0	0	2	1	3	1	1	3	1	3	3	1	1	2	2	2	2	3	3	Constanta	Eforie Sud	2	70	2	3	0	1	0	1	0
12	M54.4					1	1	1	0	1	30	1	3	3	3	3	3	1	3	0	0	3	1	3	1	3	1	1	3	3	1	1	3	3	2	3	1	2	Vaslui	Vaslui	2	69	2	2	0	1	0	1	0
13	M54.4					1	0	0	0	1	30	1	4	3	3	3	3	0	3	0	0	3	1	3	1	2	2	2	2	2	2	2	2	2	2	3	3	2	Vaslui	Vaslui	2	62	1	3	0	0	0	1	0
14	M16.0					0	0	1	0	1	10	1	3	4	4	4	4	0	4	0	0	4	3	3	1	3	1	1	3	3	1	1	3	3	3	3	0	-	Teleorman	Turnu Magurele	2	70	2	5	0	0	0	1	0
15	M54.4					0	0	0	0	1	5	1	3	3	3	4	3	0	4	0	0	4	3	3	1	3	1	1	3	3	1	1	3	3	3	3	1	5	Teleorman	Turnu Magurele	2	69	1	3	0	0	0	0	0
16	M16.0	M17.0				1	0	1	0	0	35	0	4	5	5	3	4	0	4	0	0	2	1	3	1	3	1	1	3	3	1	1	3	3	3	3	3	3	Bucuresti	Bucuresti	2	78	1	3	0	0	0	1	0
17	M54.4					1	1	1	1	1	15	1	4	5	5	3	4	0	4	0	0	3	2	3	1	3	1	1	3	3	1	1	3	3	3	3	3	2	Neamt	Roman	2	58	2	3	0	0	0	1	0
18	M79.08	M17.0				1	1	1	1	1	25	1	4	4	4	4	4	0	4	0	0	3	3	3	1	3	1	1	3	3	1	1	3	3	2	3	4	-	Iasi	Iasi	2	62	1	4	0	0	0	1	0
19						1	0	0	0	0	20	1	3	3	3	3	4	0	4	0	0	3	3	3	1	3	1	1	3	3	1	1	2	2	2	2	3	4	Sibiu	Sibiu	2	71	1	4	0	0	0	0	0
20	M47.90					1	0	1	1	1	15	1	3	2	2	4	4	0	4	0	0	4	3	3	1	3	1	1	3	3	1	1	2	2	2	2	4	3	Maramures	Baia Mare	2	60	1	3	0	0	0	1	0
21	M17.0	M51.3				1	1	0	0	1	20	1	3	3	3	3	4	0	3	1	1	3	3	3	1	3	1	1	2	3	1	1	2	2	2	1	2	4	Maramures	Baia Mare	2	65	2	3	0	0	0	0	0
22	M47.90					1	1	1	1	1	30	1	4	4	4	4	4	0	4	0	0	3	2	3	1	3	1	1	2	3	1	1	2	2	2	3	4	3	Prahova	Cocorastii Mislii	1	65	1	3	0	0	0	1	0
23	M17.0					0	0	1	0	0	10	1	2	2	2	1	4	1	4	0	0	4	1	3	1	3	1	1	2	3	2	2	2	2	2	2	0	-	Prahova	Cocorastii Mislii	1	73	2	3	0	1	0	1	0
24	M47.90					0	0	0	1	1	5	1	2	3	3	4	4	0	4	0	0	4	1	3	1	3	1	1	3	3	1	1	2	2	1	2	4	4	Brasov	Sacele	2	65	1	3	0	0	0	1	0
25	M16.0	M17.0				1	1	1	0	1	7	1	4	4	4	3	4	0	4	0	0	3	1	3	1	3	1	1	2	3	1	1	3	3	1	2	1	4	Bistrita Nasaud	Bistrita	2	58	2	3	0	0	0	0	0
26	M47.90	M17.0	M15.0			1	0	1	0	1	30	1	4	4	4	3	4	0	4	0	0	4	2	3	2	3	2	2	3	3	2	2	3	3	3	2	4	3	Harghita	Toplita	2	67	1	5	0	0	0	1	0
27	M16.0	M17.0				1	1	1	0	1	35	1	3	3	3	3	4	0	4	0	0	3	3	3	1	3	1	1	2	3	1	1	3	3	1	2	4	3	Hargita	Toplita	2	73	2	3	0	1	0	1	0
28	M54.4					1	0	0	0	1	35	1	4	4	4	4	4	0	4	0	0	4	3	3	1	3	1	1	3	3	1	1	2	2	2	3	4	3	Bucuresti	Bucuresti	2	70	1	2	0	0	0	1	0
29	M54.4					1	0	0	0	1	5	1	2	3	3	0	-	-	-	-	-	-	-	-	-	-	-	-	-	-	-	-	-	-	-	-	-	-	Bucuresti	Bucuresti	2	65	1	5	0	0	0	1	1
30						0	0	1	0	1	6	0	4	4	4	0	-	-	-	-	-	-	-	-	-	-	-	-	-	-	-	-	-	-	-	-	-	-	Bucuresti	Bucuresti	2	59	1	3	0	0	0	0	0
31	M16.0	M17.0				1	1	1	0	0	10	1	2	4	4	0	-	-	-	-	-	-	-	-	-	-	-	-	-	-	-	-	-	-	-	-	-	-	Bucuresti	Bucuresti	2	62	2	3	0	0	0	1	1
32	M16.0	M17.9				1	1	1	0	1	35	1	4	5	5	3	4	0	4	0	0	2	2	3	2	3	2	2	3	3	2	2	3	3	3	1	4	3	Dambovita	Moreni	2	64	2	3	0	0	0	1	0
33	M47.90					1	1	1	0	1	25	1	2	3	3	4	4	0	4	0	0	4	3	3	1	3	1	1	3	3	1	1	3	3	3	3	4	3	Dambovita	Moreni	2	68	1	3	0	0	0	1	0
34	M75.8	M17.0	M81.5			1	0	1	1	1	5	0	4	5	5	4	4	0	4	0	0	4	1	3	1	3	1	1	3	3	1	1	3	3	1	3	4	3	Bucuresti	Bucuresti	2	64	1	4	0	1	0	1	0
35	M17.0					1	0	1	0	0	1	1	1	5	5	0	-	-	-	-	-	-	-	-	-	-	-	-	-	-	-	-	-	-	-	-	-	-	Bucuresti	Bucuresti	2	68	2	3	0	1	0	1	0
36	M16.0					0	1	0	0	0	5	1	4	2	2	4	4	0	4	0	0	4	3	3	1	3	1	1	3	3	1	1	3	3	3	3	4	5	Mures	Rastolnita	1	76	2	3	0	1	0	1	0
37	M54.4					0	0	1	0	1	25	1	4	3	3	3	4	0	4	0	0	4	3	3	1	3	1	1	3	3	1	1	3	3	3	2	0	-	Bacau	Letea Veche	1	64	2	3	0	0	0	0	0
38	M43					1	1	0	0	1	10	1	3	3	3	4	4	0	4	0	0	4	1	3	1	3	1	1	3	3	1	1	3	3	3	3	2	5	Maramures	Borsa	1	68	2	3	0	0	0	1	0
39						0	0	0	1	1	10	1	3	3	3	4	4	0	4	0	0	4	3	3	1	3	1	1	3	3	1	1	3	3	3	2	4	3	Covasna	Sfantu Gheorghe	2	64	1	5	0	0	0	1	0
40	M16.9					1	1	0	0	1	15	1	4	2	2	3	4	0	4	0	0	4	3	3	0	3	0	0	3	3	0	0	3	3	3	3	4	3	Covasna	Sfantu Gheorghe	2	73	2	3	0	0	0	1	0
41	M54.4	M17.1	M53.1			1	0	1	0	1	25	1	4	4	4	4	2	0	4	0	0	4	3	3	1	3	1	1	3	3	1	1	3	3	3	2	1	2	Suceava	Suceava	2	76	2	3	0	0	1	1	0
42	M51.2					1	0	1	1	1	10	1	4	4	4	4	4	0	4	0	0	4	1	3	1	2	1	1	1	1	1	1	1	1	1	2	0	-	Constanta	Constanta	2	67	2	3	0	1	0	1	0
43	M16.0	M17.0	M81.90			1	0	1	0	0	10	1	4	4	4	4	4	0	4	0	0	4	1	3	1	1	1	1	3	3	1	1	3	3	3	3	3	3	Constanta	Constanta	2	60	1	5	0	0	0	1	0
44	M47.92	M53.1				1	1	1	0	0	10	1	4	3	3	0	-	-	-	-	-	-	-	-	-	-	-	-	-	-	-	-	-	-	-	-	-	-	Constanta	Constanta	2	64	2	3	0	1	0	1	0
45	M25.51	M16.0	M17.0			1	0	1	0	1	5	1	4	4	4	4	4	0	4	0	0	3	3	3	1	3	1	1	3	3	1	1	2	2	1	2	4	3	Bihor	Oradea	2	71	1	3	0	0	0	1	0
46	M51.2	M17.0				1	0	1	0	0	20	1	4	4	4	3	4	0	4	0	0	4	1	3	1	3	1	1	3	3	1	1	2	2	1	2	0	-	Bihor	Oradea	2	76	2	1	0	1	0	1	0
47	M25.51	M54.4				1	0	1	0	1	10	0	3	3	0	3	4	0	4	0	0	4	3	3	1	3	1	1	3	3	1	1	3	3	1	2	3	3	Galati	Galati	2	59	1	3	0	0	0	1	0
48	M25.51	M17.0				1	1	0	1	1	6	0	4	3	3	2	3	0	3	0	0	3	2	3	1	1	1	1	3	3	1	1	2	1	1	2	0	-	Galati	Galati	2	62	2	4	0	1	0	1	0
49	M25.51	M16.0	M17.0			1	1	1	0	1	10	1	4	5	5	4	4	0	4	0	0	4	3	3	1	3	1	1	3	3	1	1	3	3	3	2	4	3	Mures	Targu Mures	2	62	1	4	0	0	0	1	0
50	M16.0					1	1	0	0	0	1	1	4	3	3	4	4	0	3	0	0	3	3	1	1	3	1	1	3	3	1	1	3	3	3	2	3	3	Mures	Targu Mures	2	66	2	3	0	0	0	1	0
51	M25.51	M17.0	M54.4			1	0	1	0	1	10	1	4	4	4	4	4	0	4	0	0	3	1	3	1	3	1	1	3	3	1	1	3	3	1	3	1	4	Suceava	Suceava	2	61	1	3	0	1	0	1	0
52	M79.08	M4.26				1	0	1	0	0	6	0	4	3	3	1	3	0	0	0	0	2	1	3	1	3	1	1	3	3	1	1	3	2	2	2	0	3	Vaslui	Vaslui	2	67	1	4	0	0	0	1	0
53	M79.08					1	1	1	0	0	10	1	2	3	3	3	4	0	4	0	0	3	1	3	1	3	1	1	3	3	1	1	2	2	1	2	2	4	Vaslui	Puscas	1	58	1	3	0	1	0	1	0
54	M79.08					0	1	0	0	1	5	0	4	3	3	3	4	0	4	0	0	3	1	3	1	3	1	1	3	3	1	1	3	3	3	3	4	3	Vaslui	Puscas	1	64	2	3	0	1	0	0	0
55	M47.90	M16.0				1	1	0	1	0	10	1	4	4	4	4	4	0	4	0	0	3	1	3	1	3	1	1	3	3	1	1	3	3	1	3	4	3	Mures	Targu Mures	2	63	1	5	0	1	0	1	1
56	M16.0	M17.0				0	1	1	0	1	5	1	3	3	3	3	4	0	4	0	0	3	1	3	1	3	1	1	3	3	1	1	3	3	1	2	4	3	Mures	Targu Mures	2	44	1	3	0	0	0	1	0
57	M75.8	M17.0				0	0	1	0	0	35	1	2	3	3	1	-	-	-	-	-	-	-	-	-	-	-	-	-	-	-	-	-	-	-	-	-	-	Maramures	Sighetu Marmatiei	2	73	2	3	0	0	0	1	0
58						0	0	0	1	0	1	1	1	2	2	1	-	-	-	-	-	-	-	-	-	-	-	-	-	-	-	-	-	-	-	-	-	-	Maramures	Sighetu Marmatiei	2	69	1	5	0	0	0	1	0
59	M79.08					1	1	0	0	1	5	0	4	3	3	3	3	1	3	0	0	2	1	3	1	3	1	1	3	3	1	1	2	2	1	2	3	4	Harghita	Miercurea Ciuc	2	60	1	3	0	0	0	1	0
60	M17.0					1	0	1	0	1	10	1	4	3	3	2	-	-	-	-	-	-	-	-	-	-	-	-	-	-	-	-	-	-	-	-	-	-	Covasna	Valea Crisului	1	67	2	3	0	1	0	1	0
61	M25.51	M16.0				1	1	0	0	0	15	1	4	4	4	4	4	0	4	0	0	3	2	3	1	3	1	1	3	3	1	1	3	3	3	2	3	4	Covasna	Reci	1	65	1	3	0	0	0	1	0
62	M16.9					0	0	0	1	1	20	1	4	2	2	1	3	1	4	0	0	2	1	3	0	3	0	0	3	3	0	0	2	2	2	2	1	-	Covasna	Reci	1	72	2	3	0	0	0	1	0
63	M25.51	M54.44				1	0	0	0	1	5	1	4	3	3	4	4	0	4	0	0	3	2	3	1	3	1	1	3	3	1	1	3	3	3	3	4	5	Mures	Campenita	1	66	1	3	0	0	0	1	0
64	M47.20					1	0	0	0	1	2	0	2	1	1	1	2	1	3	0	0	3	1	3	1	2	1	1	2	3	1	1	1	3	3	2	0	-	Mures	Campenita	1	65	2	3	0	0	0	0	0
65	M17.0					1	0	1	0	1	25	1	4	5	5	4	4	0	4	0	0	3	2	3	1	3	1	1	3	3	1	1	3	3	3	2	4	3	Galati	Galati	2	65	1	4	0	0	0	1	0
66	M17.0	M54.4				1	0	1	0	1	10	1	4	3	3	0	-	-	-	-	-	-	-	-	-	-	-	-	-	-	-	-	-	-	-	-	-	-	Galati	Galati	2	70	2	1	0	1	0	0	0
67	M40.26					1	0	0	0	1	10	1	4	5	5	4	4	0	4	0	0	3	2	3	1	3	1	1	3	3	1	1	3	3	3	3	4	3	Prahova	Sirna	1	71	1	3	0	0	0	0	0
68	M19.08					0	1	1	0	0	5	1	4	3	3	4	4	0	4	0	0	3	1	3	1	3	1	1	3	3	1	1	3	3	3	2	3	4	Prahova	Sirna	1	79	2	3	0	0	0	1	0
69	M47.90	M16.0				1	0	1	0	1	30	1	4	4	4	4	3	1	4	0	0	3	2	3	2	3	2	2	3	3	2	2	3	3	3	2	4	5	Bistrita Nasaud	Lunca Ilvei	1	58	1	3	0	0	0	1	0
70						1	0	0	0	0	35	1	1	4	4	4	4	0	4	0	0	4	1	3	1	3	1	1	3	3	1	1	3	3	3	3	4	5	Bistrita Nasaud	Lunca Ilvei	1	60	2	5	0	0	0	1	0
71	M79.08	M54.4				1	1	1	1	1	15	1	4	4	4	0	-	-	-	-	-	-	-	-	-	-	-	-	-	-	-	-	-	-	-	-	-	-	Vaslui	Vaslui	2	72	1	3	0	0	0	1	0
72	M16.0	M17.0				1	1	1	0	1	10	1	4	4	4	3	4	0	4	0	0	3	1	3	1	3	1	1	3	3	1	1	3	3	3	2	4	3	Vaslui	Vaslui	2	76	2	3	0	0	0	1	0
73	M25.51	M54.4				1	0	0	0	1	30	1	3	4	4	4	4	0	4	0	0	3	2	3	1	3	1	1	3	3	1	1	3	3	3	3	3	3	Galati	Tecuci	2	78	2	4	0	0	0	0	0
74	M16.0	M53.1				0	1	0	0	0	40	0	3	3	3	4	4	0	4	0	0	3	1	3	1	3	1	1	3	3	1	3	3	3	3	3	4	5	Bucuresti	Bucuresti	2	78	2	3	0	0	0	1	0
75	M15.0	M53.1				1	0	0	1	0	20	0	4	4	4	3	4	0	4	0	0	3	1	3	1	3	1	1	3	3	1	1	3	3	3	2	3	2	Buzau	Buzau	2	69	1	3	0	0	0	1	0
76	M17.0	M81.90	M25.51			1	0	0	0	1	10	0	4	4	4	2	3	1	-	-	-	-	-	-	-	-	-	-	-	-	-	-	-	-	-	-	-	-	Maramures	Baia Mare	2	69	1	3	0	0	0	1	0
77	M17.0	M25.51				1	0	1	0	1	10	1	4	4	4	4	-	-	4	0	0	4	3	3	1	3	3	1	3	3	2	1	3	3	3	2	4	3	Harghita	Plesii de Jos	1	67	1	3	0	0	0	1	0
78	M54.4					1	0	0	0	0	10	1	4	3	3	3	4	1	4	0	0	4	3	3	1	3	1	1	3	3	1	1	3	3	3	2	3	3	Covasna	Sfantu Gheorghe	2	55	1	5	0	0	0	1	0
79	M47.90					1	0	1	0	1	5	0	2	2	2	4	4	0	4	0	0	3	3	3	1	3	1	1	3	3	1	1	3	3	3	3	4	3	Satu Mare	Satu Mare	2	60	1	5	0	0	0	1	0
80	M16.0	M17.0				1	1	1	0	1	10	1	4	5	5	4	4	0	4	0	0	3	2	3	2	3	2	2	3	3	2	2	3	3	3	3	4	3	Satu Mare	Satu Mare	2	66	1	5	0	0	0	1	0
81	M19.08	M47.90				1	0	1	0	1	40	1	4	3	3	3	4	0	4	0	0	2	1	3	1	3	1	1	3	3	1	1	3	3	3	1	3	4	Dolj	Craiova	2	73	1	3	0	1	0	1	0
82						1	0	0	0	0		1	1	1	1	0	-	-	-	-	-	-	-	-	-	-	-	-	-	-	-	-	-	-	-	-	-	-	Dolj	Craiova	2	65	1	5	0	1	0	1	0
83	M43.20	M47.92				1	0	0	0	1	20	1	4	4	4	3	4	0	4	0	0	3	2	3	1	3	2	2	3	3	2	2	3	3	3	3	3	4	Timis	Timisoara	2	60	2	4	0	0	0	1	0
84	M15.0					1	0	0	0	1	5	1	1	1	1	3	4	0	4	0	0	3	1	3	1	3	0	0	3	3	0	0	3	3	3	3	2	5	Timis	Timisoara	2	65	2	3	0	0	0	1	0
85	M47.90	M19.9				1	0	1	0	1	15	1	4	4	4	4	4	0	4	0	0	4	1	3	1	3	1	1	3	3	1	1	3	3	3	3	4	3	Mures	Gorghiu	1	68	1	3	0	0	0	0	0
86	M16.0	M17.0				0	1	1	0	0	6	1	4	4	4	3	4	1	3	0	0	4	-	-	-	-	-	-	-	-	-	-	-	-	-	-	0	-	Bucuresti	Bucuresti	2	64	1	2	0	0	0	1	0
87	M54.4					1	1	1	0	1	10	1	4	5	5	4	4	0	4	0	0	3	1	3	1	3	1	1	3	3	1	1	3	3	3	2	4	4	Bucuresti	Bucuresti	2	61	1	3	0	0	0	1	0
88	M16.0					0	1	0	0	0	5	1	4	3	3	3	4	1	3	0	0	3	1	3	1	3	1	1	3	3	1	1	3	3	3	3	2	5	Cluj	Cluj-Napoca	2	65	2	3	-	-	-	-	-
89	M16.0	M70.7				0	1	1	0	1	8	1	2	3	4	3	4	0	4	0	0	3	1	3	1	3	1	1	3	3	1	1	3	3	3	1	3	4	Mures	Reghin	2	68	1	3	0	0	0	1	1
90	M16.0	M17.0				0	1	1	0	1	10	1	4	3	3	2	-	-	-	-	-	-	-	-	-	-	-	-	-	-	-	-	-	-	-	-	-	-	Mures	Reghin	2	63	1	3	0	0	0	1	0
91	M79.08					0	1	1	0	0	50	1	4	3	3	4	4	0	4	0	0	2	1	3	1	3	1	1	3	3	1	1	3	3	3	2	2	5	Vaslui	Albesti	1	78	2	3	0	0	0	1	0
92	M79.08					0	1	1	1	0	40	1	4	3	3	3	4	0	4	0	0	3	1	3	1	3	1	1	3	3	1	1	3	2	1	2	3	5	Vaslui	Albesti	1	74	1	3	0	0	0	1	0
93	M79.08					1	1	0	0	1	30	0	4	3	3	4	4	0	4	0	0	3	1	3	1	3	1	1	3	3	1	1	3	3	3	3	3	4	Harghita	Ditrau	1	80	1	5	0	1	0	1	0
94	M79.08					1	0	1	0	1	10	0	4	3	3	1	-	-	-	-	-	-	-	-	-	-	-	-	-	-	-	-	-	-	-	-	-	-	Harghita	Miercurea Ciuc	2	74	1	2	0	0	0	1	0
95	M47.90	M25.51	M17.0			1	0	0	1	1	5	1	4	4	4	4	3	1	3	0	0	2	3	1	1	3	1	1	3	3	1	1	2	2	2	2	1	-	Harghita	Mihaileni	1	64	1	3	0	0	0	1	0
96	M17.0	M25.51				0	1	0	0	1	5	1	4	3	3	1	-	-	-	-	-	-	-	-	-	-	-	-	-	-	-	-	-	-	-	-	-	-	Harghita	Mihaileni	1	70	2	3	0	1	0	1	1
97	M79.08					1	1	1	0	1	9	1	4	3	3	2	-	-	-	-	-	-	-	-	-	-	-	-	-	-	-	-	-	-	-	-	-	-	Covasna	Belan	1	64	1	3	0	0	0	1	1
98	0	M25.51				1	1	1	0	1	10	1	4	2	3	4	4	0	4	0	0	3	1	3	1	3	1	1	3	3	1	1	2	2	1	2	3	5	Covasna	Belan	1	68	2	3	0	0	0	1	0
99	M47.90	M16.0				1	0	0	0	1	25	1	4	4	4	3	4	0	2	0	0	2	1	3	1	3	1	1	3	3	1	1	2	2	3	4	2	-	Covasna	Targu Secuiesc	2	61	1	5	0	0	0	1	0
100	M54.4	M17.0				1	0	1	0	0	20	1	4	2	2	0	-	-	-	-	-	-	-	-	-	-	-	-	-	-	-	-	-	-	-	-	-	-	Covasna	Targu Secuiesc	2	63	2	3	0	0	0	1	0
101	M47.90					1	1	1	0	0	15	1	3	2	2	3	3	1	3	0	0	2	1	3	1	1	1	1	3	3	1	1	1	1	1	1	4	2	Covasna	Miercurea Ciuc	2	63	1	3	0	0	0	1	0
102	M16.0	M17.0				0	1	1	0	1	20	1	4	3	3	4	4	0	4	0	0	3	3	3	1	3	1	1	3	3	1	1	3	3	3	3	4	5	Bucuresti	Bucuresti	2	66	1	5	0	0	0	1	0
103						0	0	0	0	0		1	#NULL!	#NULL!	#NULL!	#NULL!	-	-	-	-	-	-	-	-	-	-	-	-	-	-	-	-	-	-	-	-	-	-	Bucuresti	Bucuresti	2	61	2	3	0	0	0	0	0
104	M16.0					1	1	1	0	1	20	1	2	3	3	4	4	0	4	0	0	4	2	3	1	3	1	1	3	3	1	1	3	3	3	3	4	3	Covasna	Sfantu Gheorghe	2	80	1	5	0	0	0	0	0
105	M16.0					1	1	0	0	0	15	1	2	2	2	4	4	0	4	0	0	4	3	3	1	3	1	1	3	3	1	1	3	3	3	3	2	5	Covasna	Sfantu Gheorghe	2	75	1	3	0	0	0	1	1
106	M16.0	M17.0	M25.51			1	1	1	0	1	10	1	4	3	3	4	4	0	3	0	0	3	2	3	1	3	1	1	3	3	1	1	3	3	3	2	3	4	Harghita	Miercurea Ciuc	2	68	1	3	0	0	0	1	0
107	M79.08					0	1	1	0	1	15	1	3	2	2	4	3	1	4	0	0	3	3	1	1	3	1	1	3	3	1	1	1	3	3	1	3	4	Harghita	Vlahita	1	66	2	3	0	0	0	1	0
108	M16.0	M17.0				1	1	1	1	1	10	1	4	3	3	3	4	0	4	0	0	2	3	3	1	3	1	1	3	3	1	1	3	3	3	2	4	4	Harghita	Vlahita	1	61	1	1	0	0	0	1	0
109	M17.0	M79.08				1	0	0	0	1	40	0	3	2	2	4	3	0	4	0	0	3	2	3	2	3	2	2	3	3	2	2	3	3	3	2	2	5	Harghita	Vlahita	1	67	1	1	0	0	0	1	0
110	M47.92					1	0	0	0	1	20	1	4	3	3	4	4	0	4	0	0	4	1	3	1	3	1	1	3	3	1	1	3	3	3	3	4	4	Mures	Tarnaveni	2	68	1	3	0	0	0	0	0
111	M79.08					1	1	0	1	1	25	1	4	3	3	4	4	0	4	0	0	3	1	3	1	3	1	1	3	3	1	1	3	3	3	3	4	3	Mures	Tarnaveni	2	76	1	3	0	0	0	1	0
112	M16.0	M17.0				0	1	1	0	0	30	1	3	3	3	0	-	-	-	-	-	-	-	-	-	-	-	-	-	-	-	-	-	-	-	-	-	-	Sibiu	Sibiu	2	82	2	3	0	0	0	1	0
113	M25.51	M16.0				0	1	0	0	1	6	1	4	4	4	4	4	0	4	0	0	3	2	3	1	3	1	1	3	3	1	1	3	3	3	3	3	4	Bistrita Nasaud	Unirea	1	65	1	4	0	0	0	1	0
114	M79.08					0	1	0	1	1	10	1	4	3	3	4	4	0	4	0	0	4	3	3	1	3	1	1	3	3	1	1	3	3	3	3	4	5	Bistrita Nasaud	Unirea	1	69	1	3	0	0	0	1	0
115	M25.51	M17.0				0	1	0	0	1	30	1	4	3	3	4	4	0	4	0	0	4	1	3	1	3	1	1	3	3	1	1	3	3	3	2	4	5	Covasna	Sfantu Gheorghe	2	63	1	3	0	0	0	1	1
1	M16.0	M53.1				0	1	0	0	1	25	1	3	4	4	3	3	1	3	0	0	3	3	3	1	3	1	1	3	3	1	1	3	3	3	3	4	5	Dambovita	Targoviste	2	66	1	5	0	0	0	1	0
2	M16.0	M17.0				1	1	1	0	1	10	1	4	4	4	4	3	1	4	0	0	3	2	3	1	3	1	1	3	3	1	1	3	3	3	3	4	4	Dambovita	Targoviste	2	69	1	1	0	0	0	1	0
3	M16.0					0	1	1	0	0	15	1	2	4	4	4	4	0	4	0	0	3	1	3	1	3	1	1	3	3	1	1	2	3	3	2	4	5	Dambovita	Bezdead	1	64	1	5	0	0	0	1	0
4	M25.51	M17.0				1	1	0	0	1	40	1	4	2	2	3	4	1	4	0	0	3	3	3	1	3	1	1	3	3	1	1	3	3	3	2	4	5	Harghita	Cozmeni	1	56	1	3	0	0	0	1	0
5	M25.51	M17.0				0	0	1	0	1	10	1	3	3	3	4	4	0	3	0	0	3	1	3	1	3	1	1	3	3	1	1	3	3	3	3	4	4	Salaj	Plesca	1	72	1	3	0	0	0	1	0
6	M47.90	M25.51				1	0	0	0	1	15	1	4	3	3	4	4	0	4	0	1	3	1	3	1	3	1	1	3	3	1	1	3	3	2	3	4	5	Salaj	Plesca	1	67	1	3	0	0	0	1	0
7	M47.90					1	0	0	0	1	15	1	2	4	4	4	4	0	4	0	0	4	3	3	3	2	1	3	3	2	1	3	3	3	3	3	4	4	Satu Mare	Negresti Oas	2	65	1	3	0	0	0	1	0
8	M16.0	M17.0	M15.0			0	1	1	0	1	20	1	4	3	3	4	4	0	3	0	0	2	1	3	1	3	1	1	3	3	1	1	3	3	3	2	4	4	Satu Mare	Negresti Oas	2	68	1	3	0	0	0	1	0
9	M54.4					1	1	0	0	1	13	1	4	3	3	4	3	0	4	0	0	4	1	3	1	2	2	1	2	2	1	1	2	2	2	1	3	4	Maramures	Baia Mare	2	67	2	3	0	1	0	1	0
10	M81.90	M47.90	M16.0	M17.0		1	1	1	1	1	40	0	3	4	4	4	4	0	4	0	0	4	1	1	1	3	1	1	3	3	1	1	3	3	3	3	4	5	Maramures	Baia Mare	2	64	1	5	0	0	0	1	0
11	M25.51	M54.4				1	0	0	0	1	9	1	4	3	3	3	3	1	3	0	0	3	1	3	1	3	3	1	3	3	1	1	3	3	3	2	4	5	Harghita	Remetea	1	63	1	3	0	0	0	1	0
12	M47.90	M81.90	M53.1			0	1	0	0	1	65	1	3	3	3	4	4	0	4	0	0	4	1	2	1	3	1	1	3	3	1	1	3	3	3	3	4	4	Braila	Braila	2	81	1	3	0	1	0	1	0
13						0	0	0	0	1	10	1	4	4	4	3	4	0	4	0	0	3	1	3	1	3	1	1	3	3	1	1	2	2	2	2	2	5	Bucuresti	Bucuresti	2	67	2	5	0	0	0	1	0
14	M06.99					1	1	1	0	1	35	1	4	5	5	4	4	0	4	0	0	4	2	3	2	3	2	2	3	3	2	2	3	3	3	3	4	5	Bucuresti	Bucuresti	2	59	1	3	0	0	0	0	0
15	M47.90					1	1	1	0	1	15	1	4	3	3	1	3	1	4	0	0	4	1	3	1	3	1	1	3	3	1	1	2	2	2	2	4	4	Covasna	Sfantu Gheorghe	2	76	1	3	0	0	0	1	0
16						0	0	1	0	0	20	1	4	1	1	2	-	-	-	-	-	-	-	-	-	-	-	-	-	-	-	-	-	-	-	-	-	-	Bucuresti	Bucuresti	2	77	2	3	0	1	0	1	0
17	M16.0	M25.51				1	0	1	0	1	50	1	4	3	3	2	-	-	-	-	-	-	-	-	-	-	-	-	-	-	-	-	-	-	-	-	-	-	Harghita	Tusnad	2	78	2	3	0	0	0	0	0
18	M17.0					0	1	1	1	1	15	1	4	4	4	3	3	0	4	0	0	4	1	3	1	3	1	1	3	3	1	1	2	2	2	2	0	-	Bucuresti	Bucuresti	2	60	2	3	0	1	0	1	0
19						1	1	0	0	0	3	1	2	2	2	2	-	-	-	-	-	-	-	-	-	-	-	-	-	-	-	-	-	-	-	-	-	-	Bacau	Bacau	2	60	2	3	0	1	0	1	0
20	M24.8	M54.4	M81.90			1	0	1	1	1	20	1	4	5	5	2	-	-	-	-	-	-	-	-	-	-	-	-	-	-	-	-	-	-	-	-	-	-	Bihor	Oradea	2	76	1	3	0	0	0	1	0
21	M54.4					1	0	0	0	1	60	0	4	3	3	4	4	0	4	0	0	4	3	3	1	3	1	1	3	3	1	1	3	3	3	1	4	5	Bihor	Oradea	2	79	2	3	0	1	0	1	0
22	M47.92					1	0	0	0	1	5	1	2	3	3	2	-	-	-	-	-	-	-	-	-	-	-	-	-	-	-	-	-	-	-	-	-	-	Bihor	Oradea	2	62	2	3	0	1	0	1	0
23	M17.0					1	0	1	0	0	15	1	3	3	3	4	4	1	4	0	0	3	1	3	1	3	1	1	3	3	1	1	3	3	3	1	4	3	Cluj	Cluj-Napoca	2	75	2	3	0	0	0	1	0
24	M16.0	M17.0	M25.51			0	1	1	0	1	35	1	4	4	4	3	4	0	4	0	0	4	1	3	1	3	1	1	3	3	1	1	3	3	3	4	4	5	Cluj	Cluj-Napoca	2	66	1	1	0	0	0	1	1
25	M25.51	M17.0				0	0	1	0	1	3	1	4	3	3	0	-	-	-	-	-	-	-	-	-	-	-	-	-	-	-	-	-	-	-	-	-	-	Buzau	Ramnicu Sarat	2	72	2	3	0	1	0	1	0
26	M79.08					1	1	1	1	1	10	1	4	3	3	3	3	1	4	0	0	3	1	3	1	3	1	1	3	3	1	1	2	2	2	2	0	-	Buzau	Ramnicu Sarat	2	64	1	3	0	0	0	1	0
27	M54.4	M17.0				1	0	1	0	0	20	1	2	3	3	2	-	-	4	0	0	4	-	-	-	-	-	-	-	-	-	-	-	-	-	1	0	-	Mures	Sarmasu	2	65	2	3	0	0	0	1	0
28	M79.08	M17.0				1	0	0	0	1	15	1	4	3	3	4	4	0	4	0	0	4	1	3	1	3	1	1	3	3	1	1	3	3	3	2	2	5	Mures	Sarmasu	2	61	1	3	0	0	0	0	0
29	M54.4	M25.51				1	0	0	0	1	30	1	2	2	2	3	4	0	4	0	0	4	1	3	1	3	1	1	3	3	1	1	3	3	3	3	4	3	Olt	Izbiceni	1	67	1	3	0	0	0	1	0
30	M16.0	M25.51				1	0	0	0	1	10	1	4	3	3	4	4	0	4	0	0	4	1	3	1	3	1	1	3	3	1	1	3	3	3	3	4	3	Olt	Izbiceni	1	59	1	3	0	0	0	0	0
31	M16.0	M17.0				0	1	1	0	1	25	0	2	3	3	0	-	-	-	-	-	-	-	-	-	-	-	-	-	-	-	-	-	-	-	-	-	-	Olt	Izbiceni	1	68	1	3	0	0	0	1	0
32	M25.51					1	1	0	0	1	20	0	4	2	2	3	4	0	4	0	0	4	1	3	1	3	1	1	3	3	1	1	3	3	3	2	4	3	Olt	Izbiceni	1	73	2	3	0	1	0	1	0
33	M47.90					0	0	0	1	1	10	1	4	3	3	3	4	0	4	0	0	4	1	3	1	3	1	1	3	3	1	1	3	3	3	3	3	3	Harghita	Tomesti	1	58	2	3	0	1	0	1	0
34	M17.0					0	0	1	0	1	10	1	2	2	2	3	4	0	4	0	0	4	0	3	0	3	0	0	3	3	1	1	2	2	2	2	3	4	Harghita	Tomesti	1	56	1	3	0	0	0	1	0
35	M79.08					1	1	1	1	1	7	1	3	3	3	3	4	0	4	0	0	4	0	3	0	3	0	0	3	3	0	0	3	3	3	2	3	3	Timis	Timisoara	2	60	1	4	0	0	0	1	0
36	M16.0	M17.0				1	1	1	0	0	10	1	2	3	3	4	4	0	4	0	0	4	0	3	0	3	0	0	3	3	0	0	3	3	3	2	2	4	Timis	Timisoara	2	66	2	3	0	1	0	1	0
37	M47.90					1	0	1	0	1	15	1	4	4	4	4	4	0	4	0	0	4	1	3	1	3	1	1	3	3	1	1	3	3	3	3	4	5	Neamt	Piatra Neamt	2	63	1	5	0	0	0	0	0
38	M81.90					0	1	1	1	1	35	1	4	4	4	0	-	-	-	-	-	-	-	-	-	-	-	-	-	-	-	-	-	-	-	-	-	-	Vaslui	Vaslui	2	65	1	3	0	0	0	1	1
39	M16.0	M17.0				1	1	1	0	1	20	1	4	4	4	3	4	0	4	0	0	3	1	2	1	3	1	1	3	3	1	1	2	2	2	4	3	4	Maramures	Sighetu Marmatiei	2	72	1	5	0	1	0	1	0
40	M79.08					1	0	0	0	1	15	0	4	4	4	4	4	0	4	0	0	3	1	3	1	3	1	1	3	3	0	0	3	3	3	3	2	3	Calarasi	Calarasi	2	50	1	3	0	0	0	1	0
41	M25.51					1	0	0	0	1	10	1	2	3	3	0	-	-	-	-	-	-	-	-	-	-	-	-	-	-	-	-	-	-	-	-	-	-	Calarasi	Calarasi	2	67	2	3	0	0	1	0	0
42						0	0	1	0	1		1	4	5	5	0	-	-	-	-	-	-	-	-	-	-	-	-	-	-	-	-	-	-	-	-	-	-	Bucuresti	Bucuresti	2	78	2	3	0	0	0	1	0
43	M81.90	M25.51	M16.0	M17.0		0	0	1	0	1	5	1	4	5	5	0	-	-	-	-	-	-	-	-	-	-	-	-	-	-	-	-	-	-	-	-	-	-	Bucuresti	Bucuresti	2	72	1	3	0	0	0	1	0
44	M25.51	M16.0	M17.0			0	1	1	0	1	1	1	4	4	4	3	3	1	4	0	0	3	1	3	1	3	1	1	3	3	1	1	3	2	3	1	3	5	Bucuresti	Bucuresti	2	68	1	5	0	1	0	1	0
45	M79.08					1	1	1	1	1	40	1	4	4	4	4	3	1	4	0	0	3	1	3	1	3	1	1	3	3	1	1	3	3	3	4	3	3	Bucuresti	Bucuresti	2	74	2	3	0	1	0	1	0
46	M47.90	M53.1				1	0	0	1	1	3	0	2	2	2	4	4	0	4	0	0	4	1	3	1	3	1	1	3	3	1	1	3	3	3	3	4	5	Maramures	Coruia	1	65	2	3	0	1	0	1	1
47	M25.51	M16.0	M17.0			1	1	1	1	1	10	0	3	4	4	3	4	0	4	0	0	4	1	3	1	3	1	1	3	3	1	1	3	3	3	2	4	5	Maramures	Coruia	1	63	1	3	0	0	0	1	0
48	M25.51	M17.0				0	0	1	0	1	30	1	2	3	3	3	3	1	3	0	0	2	1	3	1	3	1	1	3	3	1	1	2	2	2	3	3	5	Maramures	Coruia	1	68	1	3	0	0	0	1	0
49	M17.0					0	0	1	0	0	10	1	1	3	3	4	3	1	4	0	0	3	1	3	1	3	1	1	3	3	1	1	1	1	1	1	4	3	Satu Mare	Vama	1	69	2	3	0	0	0	1	0
50	M79.08					0	0	1	1	1	6	1	4	3	3	4	4	0	4	0	0	3	1	3	1	3	1	1	3	3	1	1	2	2	2	1	4	3	Satu Mare	Vama	1	62	1	3	0	0	0	1	0
51	M25.51	M47.90				1	0	0	0	1	15	0	2	3	3	3	4	0	4	0	0	3	1	3	1	3	1	1	3	3	1	1	3	3	3	1	3	5	Covasna	Micfalau	1	63	2	3	0	0	0	0	0
52	M47.90					1	0	0	0	1	10	1	4	3	3	4	4	1	4	0	0	3	1	3	1	3	1	1	3	3	1	1	3	3	1	4	3	3	Covasna	Micfalau	1	61	1	3	0	0	0	1	0
53	M25.51					0	0	0	1	1	5	1	2	3	3	4	2	1	3	0	0	3	1	3	1	3	1	1	3	3	1	1	1	1	1	4	0	-	Galati	Galati	2	68	2	3	0	1	0	1	1
54	M79.08					1	0	0	1	1	10	1	4	4	4	4	4	0	4	0	0	2	1	3	1	3	1	1	3	3	1	1	3	3	3	2	3	3	Galati	Galati	2	65	1	3	0	0	0	1	0
55	M79.08					1	0	0	1	1	10	0	4	3	3	4	4	0	4	0	0	3	1	3	1	3	1	1	3	3	1	1	3	3	3	2	4	3	Covasna	Batanii Mari	1	65	1	3	0	0	0	1	0
56	M47.90					1	1	1	1	1	16	0	4	4	4	4	4	0	4	0	0	3	1	3	1	3	1	1	3	3	1	1	3	3	3	3	4	5	Covasna	Batanii Mari	1	63	2	3	0	0	0	1	0
57	M24.8	M16.0				1	1	0	0	0	10	1	4	3	3	4	3	2	4	0	0	3	1	3	1	3	1	1	3	3	1	1	3	3	3	3	3	3	Maramures	Sighetu Marmatiei	2	67	1	5	0	0	0	1	0
58	M16.0					1	0	0	0	1	40	1	3	3	3	3	3	1	4	0	0	2	1	3	0	3	1	0	3	3	0	0	2	2	2	3	1	-	Maramures	Sighetu Marmatiei	2	70	1	3	0	0	0	1	0
59	M16.0	M17.0				1	1	1	1	1	40	1	4	5	5	4	4	0	4	0	0	3	1	3	1	3	1	1	3	3	1	1	3	3	3	1	4	3	Bistrita Nasaud	Monor	1	66	2	3	0	0	0	1	0
60	M17.0					1	0	1	0	0	5	1	1	5	5	4	4	0	4	0	0	3	3	3	1	3	3	1	3	3	3	1	3	3	3	2	4	5	Bistrita Nasaud	Bistrita Bargaului	1	64	1	3	0	0	0	1	1
61	M47.92	M16.0	M17.0	M53.1		1	1	1	0	0	20	0	4	3	3	4	4	0	4	0	0	3	1	3	1	3	1	1	3	3	1	1	3	3	3	4	4	5	Harghita	Miercurea Ciuc	2	59	2	3	0	1	0	1	0
62	M47.90	M16.0	M53.1			0	1	0	0	1	10	1	3	3	3	4	4	0	4	0	0	4	1	3	1	3	1	1	3	3	1	1	3	3	3	4	4	3	Harghita	Miercurea Ciuc	2	58	1	3	0	0	0	1	0
63	M47.90					1	0	0	1	1	20	1	4	4	4	3	4	0	4	0	0	3	1	3	0	3	1	1	3	3	0	0	3	3	3	4	4	3	Mures	Targu Mures	2	71	1	3	0	0	0	1	1
64	M17.0					0	0	1	0	0	4	1	4	4	4	1	3	1	3	0	0	3	1	3	0	3	1	0	3	3	0	0	3	3	3	4	0	-	Mures	Targu Mures	2	71	2	4	0	0	0	1	0
65	M43.06					1	0	0	0	1	30	1	2	3	3	4	4	0	4	0	0	4	0	2	0	3	0	0	3	3	0	0	3	2	2	2	4	3	Covasna	Lisnau	1	67	2	3	0	1	0	0	0
66	M54.4					1	0	0	0	1	17	0	4	5	5	4	4	0	4	0	0	3	1	3	1	3	3	1	3	3	2	1	3	3	3	3	4	5	Covasna	Aita Seaca	1	45	1	1	0	0	0	1	0
67	M54.4	M25.51				1	0	0	0	1	3	0	4	4	4	4	4	0	4	0	0	3	1	2	0	3	1	0	3	3	1	0	3	3	3	3	4	5	Covasna	Aita Seaca	1	50	2	3	0	1	0	1	1
68	M79.08					0	0	1	0	1	10	1	3	3	3	4	4	0	4	0	0	4	1	3	0	3	1	0	3	3	1	0	3	3	3	3	4	5	Sibiu	Medias	2	59	1	4	0	0	0	0	0
69	M54.4	M17.0				1	0	1	0	0	40	1	4	3	3	4	4	0	4	0	0	4	1	3	0	3	1	1	3	3	1	1	3	3	3	3	4	5	Bucuresti	Bucuresti	2	70	2	3	0	0	0	1	0
70	M79.08					0	1	0	0	1	20	0	4	4	4	4	4	0	4	0	0	4	1	3	1	3	1	1	3	3	1	1	3	3	3	3	3	3	Bucuresti	Bucuresti	2	62	1	3	0	0	0	1	0
71	M16.0					0	1	1	0	1	10	0	4	3	3	0	-	-	-	-	-	-	-	-	-	-	-	-	-	-	-	-	-	-	-	-	-	-	Harghita	Nicolesti	1	51	2	3	0	0	0	0	0
72	M47.90					1	0	0	0	1	40	1	3	3	3	4	4	0	4	0	0	3	2	3	0	3	1	1	3	3	1	1	3	3	3	4	4	5	Brasov	Brasov	2	75	1	3	0	0	0	1	0
73	M16.0	M17.0				0	0	1	0	1	45	1	4	3	3	4	4	0	4	0	0	3	2	3	0	3	0	0	3	3	1	0	3	3	3	4	2	3	Brasov	Brasov	2	80	2	3	0	0	0	1	0
74	M79.0.8					1	0	0	0	1	20	1	4	3	3	2	-	-	-	-	-	-	-	-	-	-	-	-	-	-	-	-	-	-	-	-	-	-	Dolj	Craiova	2	67	1	5	0	1	0	1	0
75	M54.4	M17.0				1	0	0	0	1	20	1	4	4	4	2	-	-	-	-	-	-	-	-	-	-	-	-	-	-	-	-	-	-	-	-	-	-	Dolj	Craiova	2	82	2	3	0	1	0	1	0
76	M17.0					0	1	0	0	1	40	1	2	3	3	3	4	0	4	0	0	3	1	3	0	3	1	0	3	3	1	0	3	2	3	1	4	3	Mures	Targu Mures	2	79	2	3	0	1	0	1	0
77						0	1	0	0	0	15	1	3	2	2	2	-	-	-	-	-	-	-	-	-	-	-	-	-	-	-	-	-	-	-	-	-	-	Mures	Cristesti	1	73	2	3	0	1	0	1	0
78	M16.0	M17.0	M25.51			0	0	1	0	1	10	1	4	4	4	2	-	-	-	-	-	-	-	-	-	-	-	-	-	-	-	-	-	-	-	-	-	-	Mures	Cristesti	1	66	1	4	0	0	0	1	0
79						1	0	0	0	0	3	1	2	4	4	4	4	0	4	0	0	4	1	3	0	3	1	0	3	3	0	0	3	3	3	3	4	5	Sibiu	Medias	2	72	1	5	0	0	0	1	0
80	M43.86	M25.51				1	1	0	0	1	17	1	2	3	3	4	4	0	3	0	0	3	1	3	0	3	1	1	3	3	1	1	2	2	2	2	1	-	Sibiu	Medias	2	71	1	1	0	0	0	1	0
81	M16.0	M17.0	M25.51			0	1	1	0	1	20	1	4	4	4	4	3	1	3	0	0	3	1	3	1	3	0	0	3	3	1	0	3	2	2	3	4	3	Harghita	Sandominic	1	62	2	3	0	0	0	1	0
82						0	0	1	0	1	10	1	2	3	3	2	-	-	-	-	-	-	-	-	-	-	-	-	-	-	-	-	-	-	-	-	-	-	Constanta	Constanta	2	71	1	3	0	0	0	0	0
83						0	0	0	0	1	10	1	1	2	2	3	2	0	3	0	0	3	1	1	1	1	1	1	1	1	1	1	1	1	1	3	0	-	Constanta	Constanta	2	72	2	5	0	0	0	1	1
84	M16.0	M17.0				0	1	1	0	1	20	1	4	3	3	0	-	-	-	-	-	-	-	-	-	-	-	-	-	-	-	-	-	-	-	-	-	-	Vaslui	Vaslui	2	70	1	5	0	0	0	1	0
85	M16.0	M17.0	M25.51			0	1	1	0	1	50	1	4	3	3	4	4	0	4	0	0	3	1	3	0	3	1	0	3	3	1	1	3	3	3	1	4	3	Harghita	Catalnita	1	68	1	3	0	0	0	1	0
86	M25.51	M16.0	M17.0			0	0	1	1	1	10	1	4	3	3	4	3	0	3	0	0	2	1	3	0	3	1	1	3	3	1	1	3	2	3	1	3	4	Harghita	Capelnita	1	71	2	3	0	0	0	1	0
87	M43.86					1	0	0	0	1	26	1	4	4	4	4	4	0	4	0	0	3	1	3	0	3	1	1	3	3	1	1	3	3	3	3	4	5	Covasna	Sfantu Gheorghe	2	56	1	5	0	0	0	1	0
88	M15.9					1	0	1	0	1	10	0	4	4	4	4	2	0	3	0	0	3	1	1	1	3	1	1	3	3	1	1	3	2	3	1	4	5	Harghita	Racu	1	39	1	5	0	0	0	1	0
89	M43.86					1	0	1	0	1	30	1	4	4	4	4	3	0	4	0	0	3	2	3	1	3	1	1	3	3	1	1	3	2	3	4	3	3	Covasna	Targu Secuiesc	2	70	2	3	0	1	0	1	0
90	M47.90					1	0	0	1	1	10	0	2	2	2	3	3	0	3	0	0	3	1	3	0	3	0	0	3	3	0	0	3	2	3	4	2	-	Covasna	Targu Secuiesc	2	69	1	3	0	0	0	0	0
91						1	0	1	0	1	3	1	4	3	3	4	4	0	4	0	0	3	1	3	1	3	1	1	3	3	1	1	3	2	3	2	4	5	Harghita	Tomesti	1	64	2	3	0	0	0	0	0
92	M16.0					1	1	0	0	0	10	1	4	2	2	4	4	0	4	0	0	4	2	3	1	3	0	0	3	3	1	1	3	2	3	3	4	3	Covasna	Baraolt	1	69	1	4	0	0	0	1	0
93	M79.08					1	1	0	0	1	6	0	2	3	3	0	-	-	-	-	-	-	-	-	-	-	-	-	-	-	-	-	-	-	-	-	-	-	Covasna	Baraolt	1	75	2	3	0	0	0	1	0
94						0	0	0	0	1	10	1	4	3	3	4	4	0	4	0	0	3	0	3	0	3	0	0	3	3	0	0	1	1	3	2	3	5	Harghita	Valea Rece	1	82	1	4	0	0	0	1	0
95	M79.08					1	1	1	1	1	10	0	4	2	2	4	4	0	4	0	0	4	0	3	0	3	0	0	3	3	0	0	3	3	3	3	4	5	Harghita	Miercurea Ciuc	2	71	1	5	0	0	0	1	0
96	M54.4	M17.0				1	0	1	1	1	10	1	4	3	3	4	3	0	4	0	0	3	3	3	0	3	3	0	3	3	3	0	3	3	3	3	4	4	Covasna	Targu Secuiesc	2	61	2	5	0	1	0	1	0
97	M47.90	M17.0				0	0	1	1	1	2	1	4	4	4	4	4	0	4	0	0	3	1	3	1	3	1	1	3	3	1	1	3	3	3	2	4	5	Harghita	Toplita	2	69	2	3	0	1	0	1	1
98						1	1	0	0	1	5	1	4	2	2	4	4	0	4	0	0	4	1	3	1	3	1	0	3	3	1	1	3	3	3	3	4	5	Harghita	Subcetate	1	74	1	3	0	0	0	1	0
99	M47.90	M17.0				0	0	1	1	1	10	1	2	2	2	3	3	1	3	0	0	2	0	3	0	3	1	1	3	3	1	1	2	2	3	3	4	4	Braila	Braila	2	66	1	5	0	1	0	1	0
100	M47.90					1	0	0	0	1	10	1	4	3	3	4	4	1	4	0	0	3	1	3	1	3	1	1	3	3	1	1	2	2	3	4	3	3	Harghita	Odorheiu Secuiesc	2	63	2	3	0	1	0	1	0
101	M17.0					0	1	1	0	1	40	1	4	3	3	3	4	1	3	0	0	3	1	2	0	3	0	0	3	3	1	1	2	2	3	1	0	-	Harghita	Odorheiu Secuiesc	2	61	1	3	0	0	0	1	0
102	M47.90	M17.0				1	0	0	0	1	15	1	4	5	5	3	3	0	3	0	0	3	1	3	0	3	1	0	3	3	0	0	3	2	3	3	4	3	Harghita	Balan	1	63	1	3	0	0	0	1	0
103	M47.90	M17.0				1	0	0	0	1	20	1	4	4	4	3	3	1	2	0	0	2	3	3	1	3	1	0	3	3	0	0	3	3	3	4	0	-	Harghita	Balan	1	66	2	3	0	1	0	1	0
104	M25.51	M17.0				0	0	1	0	1	30	0	2	2	2	0	-	-	-	-	-	-	-	-	-	-	-	-	-	-	-	-	-	-	-	-	-	-	Harghita	Varsag	1	63	2	3	0	0	0	0	0
105	M47.90	M17.0				1	0	1	0	1	10	1	2	2	2	1	2	0	3	0	0	2	1	3	1	3	1	0	3	3	0	0	1	1	3	1	2	4	Harghita	Varsag	1	62	1	5	0	0	0	1	0
106	M47.90	M75.8				1	0	0	0	1	50	0	4	3	3	4	4	0	4	0	0	3	1	3	0	3	1	0	3	3	2	0	2	2	3	1	4	5	Harghita	Varsag	1	73	2	3	0	0	0	1	0
107	M16.0	M53.1				1	0	1	0	1	12	1	2	2	2	4	4	0	3	0	0	3	3	3	0	3	2	0	3	3	2	0	3	2	3	2	1	-	Harghita	Varsag	1	67	1	4	0	0	0	1	0
108	M25.51	M17.0				0	1	1	0	1	60	1	2	2	2	0	-	-	-	-	-	-	-	-	-	-	-	-	-	-	-	-	-	-	-	-	-	-	Harghita	Simeria	2	85	1	3	0	0	0	1	0
109						0	0	1	0	0	23	1	2	3	3	0	-	-	-	-	-	-	-	-	-	-	-	-	-	-	-	-	-	-	-	-	-	-	Prahova	Ploiesti	2	73	1	5	0	0	0	1	0
1	M16.0					0	1	0	0	1	15	1	2	3	3	3	4	0	4	0	0	3	0	3	0	3	1	0	3	3	2	0	3	3	3	2	4	5	Bistrita Nasaud	Nuseni	1	75	2	3	0	1	0	1	0
2	M47.90	M75.8	M17.0			1	0	1	0	1	30	1	4	3	3	4	3	0	4	0	0	4	1	3	0	3	1	1	3	3	1	1	3	3	3	3	4	5	Bistrita Nasaud	Nuseni	1	70	1	2	0	0	0	1	0
3	M75.8	M19.8				0	0	0	0	1	20	1	4	3	3	3	4	1	4	0	0	3	1	3	1	3	1	1	3	3	1	1	3	3	3	3	4	5	Bistrita Nasaud	Nuseni	1	76	2	2	0	0	1	1	0
4	M75.8	M16.0	M17.0			0	1	1	0	1	15	1	4	3	3	3	3	1	4	0	0	3	1	3	1	3	1	1	3	3	1	1	3	3	3	2	3	4	Bistrita Nasaud	Nuseni	1	70	1	2	0	0	0	1	0
5	M79.08					1	0	0	0	1	2	0	4	4	5	4	4	0	4	0	0	4	1	3	1	3	1	1	3	3	1	1	3	3	3	2	4	3	Bistrita Nasaud	Malin	1	47	1	2	0	1	0	1	0
6						0	0	0	0	1	1	1	3	3	3	2	-	-	-	-	-	-	-	-	-	-	-	-	-	-	-	-	-	-	-	-	-	-	Bistrita Nasaud	Malin	1	47	2	5	0	0	0	0	0
7	M16.0	M17.0	M75.8			0	1	1	0	1	15	1	4	3	3	4	3	1	4	0	0	3	1	3	1	3	1	1	3	3	1	1	3	3	2	4	4	3	Bistrita Nasaud	Beclean	2	62	1	4	0	1	0	1	0
8	M47.90	M17.0				1	1	0	0	1	30	1	2	3	3	3	3	1	3	0	0	3	1	3	1	3	1	0	3	3	2	1	3	3	3	2	4	5	Bistrita Nasaud	Malin	1	77	1	3	0	0	0	1	0
9	M54.4					1	0	1	0	0	25	1	4	3	4	4	4	0	4	0	0	4	0	3	0	3	1	0	3	3	1	0	3	3	3	3	4	5	Satu Mare	Satu Mare	2	68	1	3	0	0	0	1	0
10	M79.08					1	0	0	0	1	10	1	3	3	3	4	4	0	4	0	0	3	1	3	0	3	1	0	3	3	1	0	3	3	3	1	3	3	Salaj	Periceni	1	62	2	3	0	1	0	1	0
11	M47.90	M75.8				0	0	0	0	1	6	0	4	4	4	1	-	-	-	-	-	-	-	-	-	-	-	-	-	-	-	-	-	-	-	-	-	-	Satu Mare	Carei	2	70	2	2	0	1	0	1	0
12	M16.0	M17.0				0	1	1	1	1	26	1	4	3	4	3	3	0	4	0	0	3	1	3	0	3	1	0	3	3	0	0	3	3	3	1	4	5	Satu Mare	Carei	2	67	1	4	0	0	0	1	0
13						0	1	1	0	0	20	1	1	1	1	2	-	-	-	-	-	-	-	-	-	-	-	-	-	-	-	-	-	-	-	-	-	-	Covasna	Baraolt	1	66	2	3	0	1	0	1	1
14	M43.86					1	0	0	0	1	10	1	3	3	3	4	4	1	4	0	0	3	1	3	0	3	1	0	3	3	1	0	3	3	3	2	4	3	Mures	Sangiorgiu de Mures	1	54	1	2	0	0	0	1	0
15	M47.90	M53.1				1	0	0	1	1	10	1	4	3	3	3	3	1	4	0	0	3	0	3	0	3	0	0	3	3	1	0	3	3	3	2	4	3	Mures	Sangiorgiu de Mures	1	63	2	5	0	1	0	1	0
16	M16.0	M17.0				1	0	1	0	1	15	1	4	4	4	4	4	0	3	0	0	2	1	3	1	3	1	1	3	3	1	1	2	2	2	4	1	-	Bucuresti	Bucuresti	2	63	1	5	0	0	0	0	1
17	M16.0	M17.0				1	1	1	0	1	5	1	4	4	5	3	3	1	4	0	0	2	2	3	2	3	2	2	3	3	2	2	3	3	3	1	0	-	Braila	Braila	2	58	1	2	0	1	0	1	1
18	M77.1					0	0	0	0	1	5	1	3	4	4	4	4	0	4	0	0	3	1	3	1	3	1	1	3	3	1	1	3	3	3	1	0	-	Braila	Braila	2	63	2	1	0	1	0	1	1
19	M79.08	M17.0	M47.90	M16.0		1	1	1	0	1	34	1	3	3	3	3	4	1	4	0	0	3	3	3	0	3	2	0	3	3	1	0	3	3	3	3	2	2	Mures	Deda	1	59	2	4	0	0	0	1	0
20	M47.90	M16.0	M17.0			1	0	1	1	1	28	1	4	3	3	3	4	0	4	0	0	3	1	3	0	3	1	0	3	3	2	0	3	3	3	1	1	-	Bucuresti	Bucuresti	2	59	1	2	0	0	0	1	0
21	M47.90	M75.8	M43.86			1	0	0	0	1	50	0	4	5	5	0	-	-	-	-	-	-	-	-	-	-	-	-	-	-	-	-	-	-	-	-	-	-	Bucuresti	Bucuresti	2	59	2	5	0	1	0	1	0
22	M47.90	M17.0				1	0	1	0	1	38	1	3	3	3	4	4	0	4	0	0	3	3	3	1	3	2	1	3	3	2	1	3	3	3	4	4	5	Mures	Campenita	1	68	2	3	0	0	0	0	0
23	M16.0	M17.0				0	1	1	0	1	20	1	4	3	3	3	4	0	4	0	0	3	3	3	1	3	1	1	3	3	1	1	3	3	3	1	3	3	Mures	Campenita	1	60	1	3	0	0	0	0	0
24	M47.90					1	0	1	0	0	45	1	3	3	3	3	4	0	4	0	0	3	2	3	0	3	2	0	3	3	2	0	3	3	3	3	0	-	Dambovita	Gura Foii	1	72	1	2	0	1	0	1	0
25	M16.0					0	1	0	1	0	3	1	2	2	2	4	3	1	4	0	0	4	0	3	0	3	0	0	3	3	0	0	2	2	3	1	3	3	Dambovita	Gura Foii	1	76	2	3	0	1	0	0	0
26	M16.0	M17.0				0	1	1	0	1	20	1	4	3	3	4	4	0	4	0	0	3	1	3	0	3	2	0	3	3	2	0	3	2	3	2	3	5	Covasna	Poian	1	57	2	5	0	0	0	1	0
27	M75.8	M16.0	M17.0			0	1	1	0	1	46	0	4	3	3	4	4	0	4	0	0	3	1	3	1	3	1	1	3	3	1	1	3	1	3	3	3	5	Covasna	Poian	1	76	2	3	0	0	0	1	0
28	M47.90	M17.0				1	0	0	1	1	54	1	4	4	4	2	-	-	-	-	-	-	-	-	-	-	-	-	-	-	-	-	-	-	-	-	-	-	Bucuresti	Bucuresti	2	64	1	4	0	0	0	1	0
29	M54.4					1	0	0	0	1	40	1	4	5	5	3	4	0	4	0	0	3	2	3	0	3	2	0	3	3	2	0	3	2	3	3	4	5	Constanta	Faclia	1	70	1	5	0	0	0	0	0
30						0	0	0	1	1	3	1	4	3	3	0	-	-	-	-	-	-	-	-	-	-	-	-	-	-	-	-	-	-	-	-	-	-	Neamt	Pangarati	1	57	2	5	0	1	0	1	0
31						1	0	0	0	1	1	1	4	1	1	2	-	-	-	-	-	-	-	-	-	-	-	-	-	-	-	-	-	-	-	-	-	-	Constanta	Constanta	2	79	2	3	0	0	0	1	0
32	M16.0	M17.0				0	1	1	0	0	10	1	4	3	3	4	4	0	4	0	0	4	0	3	0	3	1	0	3	3	1	0	3	3	3	2	4	3	Constanta	Constanta	2	76	1	2	0	0	0	0	0
33						0	0	0	0	0		1	#NULL!	#NULL!	#NULL!	#NULL!	-	-	-	-	-	-	-	-	-	-	-	-	-	-	-	-	-	-	-	-	-	-	Bucuresti	Bucuresti	2	76	2	5	0	0	1	0	0
34	M79.08					1	0	0	0	1	30	1	2	3	3	4	4	0	4	0	0	3	1	3	0	3	1	0	3	3	0	0	3	3	3	2	3	3	Maramures	Baia Sprie	2	59	1	5	0	1	0	1	0
35	M47.90	M17.0	M75.8			1	0	0	0	1	5	1	4	3	3	4	4	1	4	0	0	3	1	3	0	3	1	0	3	3	1	0	3	2	3	1	4	3	Covasna	Aita Mare	1	75	1	3	0	0	0	1	0
36	M17.0					0	0	1	0	0	1	1	4	2	2	0	-	-	-	-	-	-	-	-	-	-	-	-	-	-	-	-	-	-	-	-	-	-	Covasna	Aita Mare	1	80	2	3	0	0	0	1	0
37	M47.90	M17.0	M13.80			0	0	0	1	1	30	1	4	3	3	4	4	0	4	0	0	3	1	3	1	3	1	0	3	3	1	0	3	2	3	3	5	5	Maramures	Desesti	1	70	1	3	0	0	0	1	0
38	M16.0	M17.0	M13.80			0	1	1	1	1	10	1	4	4	4	4	4	0	3	0	0	2	1	3	0	3	2	0	3	3	2	0	3	3	3	4	1	-	Maramures	Desesti	1	57	1	5	0	0	0	1	0
39	M75.8	M17.0				1	0	0	0	1	7	1	4	3	3	4	4	0	3	0	0	2	1	3	1	3	1	1	3	3	1	1	3	3	3	2	0	-	Covasna	Turia	1	58	2	3	0	0	0	1	0
40	M16.0	M17.0	M13.80			0	0	1	1	1	8	0	4	3	3	4	4	0	3	0	0	2	1	3	0	3	1	0	3	3	1	0	2	2	3	3	4	5	Covasna	Turia	1	68	2	3	0	1	0	1	0
41	M79.08					1	0	0	0	1	7	0	4	3	3	4	4	0	3	0	0	2	1	3	0	2	2	2	3	3	2	0	3	3	3	2	4	3	Harghita	Sansimion	1	54	2	3	0	1	0	1	0
42	M79.08					0	1	1	1	1	3	0	4	3	3	0	-	-	-	-	-	-	-	-	-	-	-	-	-	-	-	-	-	-	-	-	-	-	Covasna	Baraolt	1	60	1	3	0	0	0	1	0
43	M43.86					1	1	0	0	1	5	0	4	1	1	0	-	-	-	-	-	-	-	-	-	-	-	-	-	-	-	-	-	-	-	-	-	-	Covasna	Baraolt	1	63	2	3	0	0	0	1	0
44	M17.0	M47.90				0	1	1	0	1	7	1	2	3	3	4	4	0	4	0	0	3	1	3	1	3	2	0	3	3	2	0	2	2	3	3	4	5	Harghita	Ocna de Jos	1	76	2	3	0	1	0	1	0
45	M17.0					1	0	1	0	1	45	1	4	4	4	3	4	0	3	0	0	2	1	3	1	3	1	1	3	3	1	1	3	1	3	4	0	-	Harghita	Toplita	2	60	2	3	1	0	0	1	0
46	M47.90					1	0	0	0	1	10	1	2	4	4	4	4	0	4	0	0	3	1	3	1	3	1	1	3	3	1	1	3	2	3	1	4	3	Harghita	Toplita	2	58	1	3	0	0	0	1	0
47						1	0	0	0	1		1	4	2	2	2	-	-	-	-	-	-	-	-	-	-	-	-	-	-	-	-	-	-	-	-	-	-	Maramures	Coruia	1	67	2	3	0	0	0	0	0
48	M16.0	M17.0	M47.90			1	1	1	0	1	20	0	2	3	3	4	4	0	4	0	0	3	1	3	1	3	1	1	3	3	1	1	3	2	3	2	4	5	Maramures	Coruia	1	65	1	3	0	0	0	1	0
49	M17.0					0	1	1	0	0	1	1	4	3	3	2	-	-	-	-	-	-	-	-	-	-	-	-	-	-	-	-	-	-	-	-	-	-	Harghita	Miercurea Ciuc	2	68	1	3	0	0	0	0	0
50	M53.1	M47.90				1	0	0	0	1	38	1	2	3	3	4	4	0	4	0	0	3	2	3	0	3	2	0	3	3	2	0	3	3	3	2	4	5	Harghita	Fitod	1	62	1	3	0	0	0	1	0
51	M47.90	M17.0				1	0	1	0	1	6	1	4	3	3	4	4	0	3	0	0	3	2	3	0	3	2	0	3	3	2	0	3	2	3	2	2	3	Mures	Targu Mures	2	71	1	3	0	0	0	1	0
52	M47.90					1	0	1	0	1	10	1	2	3	3	4	4	0	4	0	0	3	3	2	0	3	2	0	3	3	2	0	3	2	3	2	3	3	Mures	Targu Mures	2	74	2	3	0	0	0	1	0
53	M79.08					0	1	1	0	1	16	0	4	4	4	2	-	-	-	-	-	-	-	-	-	-	-	-	-	-	-	-	-	-	-	-	-	-	Dolj	Craiova	2	67	2	3	0	0	0	0	0
54						0	0	1	0	1	40	1	2	2	2	0	-	-	-	-	-	-	-	-	-	-	-	-	-	-	-	-	-	-	-	-	-	-	Bucuresti	Bucuresti	2	75	1	2	0	0	0	0	0
55	M47.90					1	1	0	0	1	10	0	4	4	4	3	3	1	3	0	0	2	1	3	0	3	2	0	3	3	2	0	3	2	3	4	2	4	Harghita	Sandominic	1	53	1	4	0	0	0	1	1
56	M77.0	M17.0				1	0	1	0	1	10	1	4	3	3	4	4	0	4	0	0	3	2	3	0	3	1	0	3	3	2	0	3	2	3	2	4	5	Harghita	Sandominic	1	60	1	3	0	0	0	1	0
57	M75.8	M16.0	M17.0			1	0	1	0	1	25	1	4	3	3	3	3	1	3	0	0	2	2	3	0	3	2	0	3	3	2	0	3	2	3	4	4	5	Covasna	Sanionlunca	1	74	2	3	0	0	0	1	0
58	M75.8	M17.0				1	0	1	0	1	5	0	4	3	3	4	3	1	3	0	0	2	2	3	0	3	2	0	3	3	2	0	3	2	3	2	3	4	Covasna	Sanionlunca	1	70	1	4	0	0	0	1	0
59	M16.0	M17.0	M75.8			1	0	1	0	1	3	1	4	3	3	4	3	1	4	0	0	3	1	3	0	3	2	0	3	3	2	0	3	2	3	2	4	5	Harghita	Sansimion	1	63	1	4	0	0	0	1	0
60	M43.86					1	0	0	0	1	10	0	1	3	3	3	3	1	4	0	0	3	0	3	0	3	1	0	3	3	2	0	3	2	3	2	4	3	Harghita	Sansimion	1	65	2	3	0	0	0	1	0
61	M53.1	M16.0	M17.0			1	1	0	1	1	10	1	4	3	3	4	4	0	4	0	0	4	1	3	0	3	2	0	3	3	2	0	3	2	3	3	4	3	Mures	Tirimia Mare	1	72	1	5	0	0	0	1	0
62	M79.08					1	1	1	0	1	22	1	4	3	3	4	4	0	4	0	0	3	1	3	0	3	2	0	3	3	2	0	3	2	3	3	4	5	Mures	Gheorghe Doja	1	53	1	4	0	0	0	1	0
63	M81.90	M16.0				1	1	0	1	1	20	1	4	3	3	4	4	1	4	0	0	3	0	3	0	3	2	0	3	3	1	0	3	2	3	4	4	5	Mures	Tirimia	1	61	1	3	0	0	0	1	0
64	M43.86					1	1	0	0	1	50	1	4	5	4	4	4	0	4	0	0	2	1	3	0	3	1	0	3	3	1	0	3	2	3	2	4	3	Mures	Valureni	1	71	2	1	0	0	1	1	0
65	M79.08					1	0	1	0	1	10	1	4	3	4	3	3	1	3	0	0	2	-	-	-	-	-	-	-	-	-	-	-	-	-	2	4	3	Mures	Valureni	1	66	1	1	0	0	1	0	0
66	M75.8	M17.0				1	0	1	0	1	20	1	4	3	3	4	4	1	4	0	0	3	2	3	0	3	2	0	3	3	2	0	3	2	3	2	1	5	Harghita	Tomesti	1	66	2	4	0	0	0	1	0
67	M16.0	M17.0				1	1	0	0	1	10	1	4	3	3	4	4	1	3	0	0	2	1	3	0	3	1	0	3	3	1	0	3	2	3	4	3	3	Harghita	Tomesti	1	63	1	5	0	0	0	1	0
68	M79.08					#NULL!	#NULL!	#NULL!	#NULL!	#NULL!		0	#NULL!	#NULL!	#NULL!	#NULL!	-	-	-	-	-	-	-	-	-	-	-	-	-	-	-	-	-	-	-	-	-	-	Harghita	Miercurea Ciuc	2	72	2	4	0	0	0	1	0
69	M17.0					0	0	1	0	0	1	1	4	3	2	0	-	-	-	-	-	-	-	-	-	-	-	-	-	-	-	-	-	-	-	-	-	-	Harghita	Miercurea Ciuc	2	73	2	3	0	0	0	0	0
70	M79.08					1	0	0	1	1	10	1	3	3	3	4	4	1	4	0	0	3	0	3	0	3	2	0	3	3	2	0	3	2	3	4	3	5	Harghita	Miercurea Ciuc	2	63	2	4	0	0	0	1	0
71	M81.90	M16.0	M17.0			1	0	1	0	0	1	0	4	3	3	0	-	-	-	-	-	-	-	-	-	-	-	-	-	-	-	-	-	-	-	-	-	-	Covasna	Micfalau	1	62	1	2	0	0	0	1	0
72	M47.90	M16.0	M17.0			1	1	0	0	0	6	0	2	3	3	4	4	1	4	0	0	3	0	3	0	3	1	0	3	3	1	0	3	2	3	2	4	5	Harghita	Lunca de Mijloc	1	58	1	3	0	0	0	1	0
73	M79.08					1	0	1	0	1	10	1	4	3	3	2	-	-	-	-	-	-	-	-	-	-	-	-	-	-	-	-	-	-	-	-	-	-	Harghita	Lunca de Mijloc	1	63	1	3	0	0	0	1	0
74	M75.8	M16.0	M17.0			1	0	1	0	1	10	1	4	3	3	4	4	1	4	0	0	3	0	3	0	3	1	0	3	3	1	0	3	1	3	1	3	3	Harghita	Odorheiu Secuiesc	2	54	1	3	0	0	0	1	0
75	M79.08					1	0	1	0	1	9	1	2	3	3	4	4	0	4	0	0	3	1	3	0	3	1	0	3	3	1	0	3	2	3	2	4	3	Harghita	Odorheiu Secuiesc	2	66	1	2	0	0	0	1	0
76	M47.90	M16.0	M17.0			1	0	1	1	1	20	1	4	3	3	2	-	-	-	-	-	-	-	-	-	-	-	-	-	-	-	-	-	-	-	-	-	-	Harghita	Misentea	1	61	1	2	0	0	0	1	0
77	M47.8	M17.0				1	0	1	0	1	20	1	3	3	3	3	2	0	4	0	0	3	3	3	0	3	1	0	3	3	1	0	3	2	3	1	1	-	Harghita	Miercure Ciuc	2	57	1	2	0	0	0	1	0
78	M47.90					1	0	0	0	1	17	1	1	1	1	4	4	0	4	0	0	4	1	3	0	3	1	0	3	3	1	0	3	2	3	3	4	5	Harghita	Odorheiu Secuiesc	2	65	2	3	0	0	0	0	0
79	M47.90					1	0	0	1	0	20	1	4	3	3	3	4	1	4	0	0	3	0	3	0	3	1	0	3	3	1	0	3	2	3	2	4	5	Harghita	Odorheiu Secuiesc	2	62	1	5	0	0	0	1	0
1	M47.2	M13.0				1	0	0	0	1	4	1	4	5	4	3	4	0	4	0	0	3	1	1	1	1	3	1	1	3	1	1	1	3	1	3	4	3	Neamt	Bicaz	2	63	2	2	0	0	1	1	0
2	M17.0	M19.8				1	0	1	0	1	10	1	2	3	3	3	4	1	4	0	0	4	1	1	1	3	2	0	3	3	1	0	3	2	3	3	0	-	Maramures	Baia Mare	2	68	1	4	0	0	0	1	0
3	M16.0	M17.0				1	1	0	0	0	5	0	3	3	3	3	3	0	4	0	0	4	1	3	0	3	1	0	3	3	2	1	3	2	2	2	4	3	Neamt	Piatra Neamt	2	58	2	3	0	1	0	0	0
4						1	0	0	0	0	1	0	3	3	3	3	3	2	3	0	0	4	1	2	0	2	2	2	0	2	1	0	2	2	0	2	3	5	Neamt	Piatra Neamt	2	52	1	3	0	0	1	0	0
5	M17.0	M47.90				1	0	1	1	1	20	1	3	3	3	4	4	0	4	0	0	3	1	3	0	3	1	0	3	3	1	0	3	2	3	3	2	5	Brasov	Brasov	2	72	2	3	0	0	0	1	0
6	M87.85	M16.0				0	1	0	0	1	1	0	4	2	2	3	3	1	4	0	0	3	1	3	0	3	1	0	3	3	1	0	3	3	3	1	0	-	Covasna	Sfantu Gheorghe	2	74	2	3	0	0	0	0	0
7	M41.50	M41.80	M17.0	M16.0		1	0	1	0	1	40	1	4	3	3	4	4	0	4	0	0	3	0	3	0	3	1	0	3	3	2	0	3	2	3	3	4	3	Bistrita Nasaud	Bistrita Nasaud	2	73	1	3	0	0	0	1	0
8	M16.0	M75.8				0	1	0	0	1	35	1	4	2	2	3	3	1	3	0	0	2	1	3	1	3	1	1	3	3	1	1	2	2	3	2	2	3	Bistrita Nasaud	Bistrita Nasaud	2	75	2	3	0	0	0	1	0
9	M16.0	M17.0	M47.90			0	1	1	0	1	10	1	4	3	3	4	4	0	4	0	0	3	1	3	0	3	1	0	3	3	1	0	2	2	3	3	4	5	Harghita	Tusnad Nou	1	60	2	1	0	1	0	1	0
10	M17.0					1	0	1	0	1	5	1	4	3	3	4	4	0	4	0	0	3	0	3	0	3	2	0	3	3	1	0	2	2	2	2	3	3	Harghita	Cetatuia	1	65	1	5	0	0	0	1	0
11	M77.0	M47.90				1	0	0	0	1	1	1	2	2	3	0	-	-	-	-	-	-	-	-	-	-	-	-	-	-	-	-	-	-	-	-	-	-	Harghita	Cetatuia	1	69	2	3	0	0	0	1	0
12	M79.08					1	0	0	0	1	1	1	4	3	3	2	-	-	-	-	-	-	-	-	-	-	-	-	-	-	-	-	-	-	-	-	-	-	Harghita	Baile Tusnad	2	74	1	1	0	0	0	1	0
13	M15.9					0	0	0	1	1	4	1	4	2	2	0	-	-	-	-	-	-	-	-	-	-	-	-	-	-	-	-	-	-	-	-	-	-	Harghita	Cozmeni	1	79	1	3	0	0	0	1	0
14	M16.0	M17.0				1	0	1	1	1	15	1	2	3	3	4	4	0	4	0	0	4	0	3	0	3	2	0	3	3	1	0	3	3	3	3	4	5	Harghita	Armeseni	1	68	1	3	-	-	-	-	-
15	M16.0	M17.0				0	1	1	0	0	15	1	4	3	3	4	4	0	4	0	0	4	0	3	0	3	2	1	3	3	2	1	3	3	3	3	2	5	Harghita	Armeseni	1	62	1	4	0	0	0	1	0
16	M16.0	M17.0				1	0	0	0	1	15	1	4	3	3	4	4	0	4	0	0	3	1	3	1	3	1	1	3	3	1	1	3	3	3	3	3	5	Harghita	Armeseni	1	64	1	5	0	0	0	0	0
17	M75.8	M77.0				0	0	0	1	1	5	1	3	2	2	2	-	-	-	-	-	-	-	-	-	-	-	-	-	-	-	-	-	-	-	-	-	-	Harghita	Armeseni	1	73	2	3	0	0	0	0	0
18	M79.08					0	0	1	0	1	20	1	4	3	3	4	4	0	4	0	0	3	2	3	0	3	1	1	3	3	1	1	3	3	3	3	4	5	Harghita	Cetatuia	1	87	1	3	0	0	0	1	0
19	M17.0	M75.8	M47.90			1	0	1	0	1	10	0	2	3	3	4	4	0	4	0	0	3	1	3	1	3	1	1	3	3	2	1	3	3	3	3	3	5	Harghita	Cetatuia	1	61	2	3	0	1	0	1	0
20	M51.3	M47.90				1	0	0	0	1	5	1	4	3	3	4	4	1	4	0	0	3	2	3	1	3	2	1	3	3	2	1	3	3	3	3	4	5	Harghita	Cetatuia	1	52	1	5	0	0	0	1	0
21	M75.8	M16.0	M17.0			1	0	1	1	1	40	0	4	3	3	4	4	1	4	0	0	3	2	3	1	3	2	1	3	3	2	1	3	3	3	3	3	5	Harghita	Cetatuia	1	61	2	3	0	0	0	1	0
22	M47.90	M75.8				1	0	0	1	1	35	1	4	3	3	4	3	1	4	0	0	3	2	3	1	3	2	1	3	3	2	1	3	2	3	2	3	5	Mures	Sangiorgiu de Padure	2	71	1	3	0	0	0	1	0
23	M79.08					1	1	1	1	1	52	0	4	3	3	2	-	-	-	-	-	-	-	-	-	-	-	-	-	-	-	-	-	-	-	-	-	-	Cluj	Viisoara	1	83	1	1	0	0	0	1	0
24	M47.90	M53.1				0	0	0	1	1	32	1	3	3	3	1	3	1	4	0	0	3	-	-	-	-	-	-	-	-	-	-	-	-	-	2	0	-	Cluj	Viisoara	1	75	1	1	0	0	0	1	0
25	M17.0	M75.8				0	0	1	1	1	10	1	3	3	3	4	4	0	4	0	0	3	1	3	1	3	1	1	3	3	1	1	3	2	3	3	2	3	Cluj	Viisoara	1	76	2	3	0	1	0	1	0
26						1	0	0	0	0	3	1	4	3	3	4	4	0	4	0	0	3	2	3	0	3	2	0	3	3	2	0	3	2	3	2	1	-	Harghita	Armeseni	1	58	2	3	0	0	0	1	0
27						0	1	1	1	1	10	1	3	3	3	1	3	1	4	0	0	4	0	3	0	3	0	0	3	3	1	0	2	1	3	2	1	-	Harghita	Miercurea Ciuc	2	73	2	3	0	0	0	0	0
28	M47.90	M17.0				1	1	1	0	0	2	0	3	3	3	3	4	0	4	0	0	3	2	3	1	3	2	1	3	3	2	1	3	2	3	1	4	5	Sibiu	Sibiu	2	63	1	5	0	0	0	1	0
29						0	1	1	0	1	4	1	3	3	3	1	4	0	4	0	0	3	-	-	-	-	-	-	-	-	-	-	-	-	-	2	2	3	Sibiu	Sibiu	2	64	2	1	0	1	0	1	0
30	M75.8	M17.0	M19.07			0	0	1	1	1	35	1	2	4	4	4	4	1	4	0	0	4	1	3	0	3	1	1	3	3	1	1	3	2	3	4	4	5	Harghita	Lunca de Jos	1	47	2	3	0	1	0	1	0
31	M16.0	M75.8				1	0	0	0	1	10	1	4	3	3	4	4	0	3	0	0	1	-	-	-	-	-	-	-	-	-	-	-	-	-	4	3	3	Harghita	Sanmartin	1	63	1	5	0	0	0	1	0
32						0	0	1	0	1	8	1	4	3	3	4	4	1	4	0	0	3	1	3	0	3	2	1	3	3	2	1	3	2	3	2	3	5	Harghita	Sanmartin	1	69	2	4	0	1	0	1	0
33	M79.08					1	1	1	1	1	27	1	4	4	4	3	4	1	4	0	0	3	1	3	0	3	1	0	3	3	1	1	3	2	3	2	4	5	Dambovita	Poiana	1	59	1	5	0	0	0	0	0
34	M16.0	M17.0				1	1	1	0	1	38	1	4	4	4	4	4	0	4	0	0	4	2	3	0	3	2	1	3	3	2	1	3	2	3	3	3	5	Mures	Reghin	2	72	1	3	0	1	0	1	0
35	M47.90					1	0	0	0	1	30	1	4	5	5	4	4	0	4	0	0	3	3	3	0	3	2	1	3	3	2	1	3	2	3	2	3	5	Sibiu	Simnic	1	70	2	5	0	1	0	1	0
36	M54.4					1	1	0	0	1	5	0	2	4	4	4	4	0	4	0	0	3	1	3	0	3	2	1	3	3	2	1	3	2	3	3	4	5	Harghita	Subcetate	1	64	2	3	0	1	0	0	0
37	M75.8	M43.86				1	1	1	0	1	5	0	4	4	4	3	4	0	4	0	0	3	1	3	1	3	1	1	3	3	1	1	3	2	3	2	0	-	Maramures	Soncuta Mare	2	46	1	5	0	0	0	1	0
39	M16.0	M17.0	M75.8			0	0	1	0	1	50	1	4	3	3	1	-	-	-	-	-	-	-	-	-	-	-	-	-	-	-	-	-	-	-	-	-	-	Maramures	Soncuta Mare	2	74	1	3	0	0	0	1	0
40	M77.0	M75.8	M16.0	M17.0		0	1	1	0	1	50	1	4	3	3	4	4	0	4	0	0	3	-	-	-	-	-	-	-	-	-	-	-	-	-	3	4	5	Maramures	Soncuta Mare	2	86	1	3	0	0	0	1	0
41	M16.0	M17.0	M19.07			1	0	1	0	1	38	1	4	3	3	4	4	0	4	0	0	4	1	3	0	3	2	1	3	3	1	1	3	2	3	4	4	5	Harghita	Lazaresti	1	67	1	4	0	0	0	1	0
42	M17.0	M19.07	M75.8			0	1	1	0	1	20	1	4	4	4	4	4	0	4	0	0	3	1	3	0	3	2	1	3	3	2	0	3	2	3	3	4	5	Harghita	Cozmeni	1	48	1	5	0	0	0	1	0
43						1	0	1	0	1	10	0	4	3	3	3	4	1	4	0	0	4	1	3	0	3	2	2	3	3	1	2	3	2	3	3	4	3	Harghita	Cozmeni	1	60	2	3	0	1	0	1	0
44	M75.8	M19.07				0	0	1	0	1	1	1	4	3	3	0	-	-	-	-	-	-	-	-	-	-	-	-	-	-	-	-	-	-	-	-	-	-	Harghita	Remetea	1	64	2	3	0	1	0	1	0
45	M17.0	M19.07				0	0	1	0	1	6	1	3	3	3	3	4	1	3	0	0	3	1	3	0	3	2	1	3	3	1	0	3	2	3	2	3	5	Harghita	Sansimion	1	73	2	4	0	1	0	1	0
46	M75.8	M16.0	M17.0			0	0	1	1	1	50	1	4	3	3	4	4	0	4	0	0	3	1	3	0	3	2	0	3	3	2	0	3	2	3	2	4	5	Harghita	Sansimion	1	64	1	5	0	0	0	1	0
47	M75.8	M16.0				1	1	0	0	1	15	1	4	4	4	4	4	0	4	0	0	4	2	3	0	3	2	1	3	3	2	1	3	2	3	2	4	3	Harghita	Miercurea Ciuc	2	77	1	3	0	1	0	1	0
48	M16.0	M19.07				1	1	0	0	1	1	1	2	2	2	0	-	-	-	-	-	-	-	-	-	-	-	-	-	-	-	-	-	-	-	-	-	-	Harghita	Miercurea Ciuc	2	83	2	2	0	0	0	1	0
49						1	0	0	0	1	10	1	4	2	2	0	-	-	-	-	-	-	-	-	-	-	-	-	-	-	-	-	-	-	-	-	-	-	Harghita	Subcetate	1	64	2	3	0	1	0	1	1
50	M15.9					1	0	1	0	1	15	1	4	3	3	3	3	1	3	0	0	3	3	3	1	3	2	1	3	3	2	1	3	2	3	2	3	5	Harghita	Subcetate	1	72	2	3	0	0	0	1	0
51	M79.08					0	0	1	0	0	10	1	1	1	1	4	3	1	4	0	0	4	1	3	0	3	2	1	3	3	2	1	3	2	3	4	3	3	Covasna	Bradut	1	70	1	5	0	0	0	1	0
52	M75.8	M77.0	M16.0	M17.0		0	1	1	0	1	6	1	4	3	3	4	4	0	4	0	0	3	1	3	0	3	1	0	3	3	1	0	3	2	3	1	4	3	Covasna	Bradut	1	73	1	5	0	0	0	1	0
53	M75.8	M16.0	M17.0			1	0	1	0	1	10	1	3	3	3	4	4	0	4	0	0	3	1	3	0	3	1	0	3	3	1	0	3	2	3	2	3	5	Harghita	Tomesti	1	57	2	3	0	0	0	1	0
54	M47.90	M16.0	M17.0			1	0	1	1	1	30	0	4	4	4	4	4	1	4	0	0	3	1	3	0	3	1	1	3	3	1	1	3	1	3	3	3	3	Harghita	Cristurul Secuiesc	1	73	1	3	0	0	0	1	0
55	M47.90	M16.0	M17.0			1	0	1	0	1	5	1	4	4	4	3	4	1	4	0	0	3	3	3	1	3	1	1	3	3	1	1	1	1	3	3	4	5	Harghita	Gheorgheni	2	61	1	4	0	0	0	1	0
56	M81.90	M47.90	M53.1			1	0	0	1	1	8	1	4	3	3	2	-	-	-	-	-	-	-	-	-	-	-	-	-	-	-	-	-	-	-	-	-	-	Harghita	Joseni	2	73	1	3	0	0	0	1	0
57	M17.0	M75.8				1	0	0	1	1	40	1	4	3	3	4	4	1	4	0	0	3	1	3	0	3	1	1	3	3	1	0	3	2	3	2	4	5	Harghita	Odorheiu Secuiesc	2	72	1	3	0	0	0	1	0
58	M47.90	M17.0	M75.8			1	0	0	0	1	64	1	4	3	3	4	4	0	4	0	0	3	3	2	0	3	1	0	3	3	1	0	3	3	3	2	4	5	Harghita	Odorheiu Secuiesc	2	74	1	4	0	0	0	1	0
59	M47.90	M17.0	M75.8			1	0	1	0	1	6	1	3	2	2	4	3	1	4	0	0	4	3	3	0	3	1	0	3	3	1	0	3	2	3	1	4	3	Harghita	Vlahita	1	69	2	3	0	0	0	1	0
60	M75.8	M47.90				1	0	0	0	1	1	1	4	3	3	2	-	-	-	-	-	-	-	-	-	-	-	-	-	-	-	-	-	-	-	-	-	-	Harghita	Frumoasa	1	80	2	3	0	0	0	0	0
61	M43.86					1	0	0	0	1	32	1	3	4	4	4	4	1	4	0	0	4	3	3	0	3	1	1	3	3	1	0	2	2	3	2	4	5	Covasna	Sfantu Gheorghe	2	68	2	3	0	1	0	1	0
62	M79.08					1	0	1	0	1	6	1	4	3	3	0	-	-	-	-	-	-	-	-	-	-	-	-	-	-	-	-	-	-	-	-	-	-	Arges	Pitesti	2	72	1	3	0	0	0	0	0
63						0	0	0	0	1	1	1	4	2	2	4	4	0	4	0	0	4	1	3	0	3	1	0	3	3	1	0	3	3	3	4	4	3	Arges	Pitesti	2	81	1	3	0	0	0	0	0
64	M47.90	M16.0				1	1	1	0	1	31	1	4	4	4	0	-	-	-	-	-	-	-	-	-	-	-	-	-	-	-	-	-	-	-	-	-	-	Covasna	Sfantu Gheorghe	2	67	1	3	0	0	0	1	0
65	M79.08					1	1	1	1	1	5	0	4	4	4	4	4	0	4	0	0	4	3	3	1	3	2	1	3	3	2	1	3	2	3	3	4	3	Harghita	Sandominic	1	60	1	3	0	0	0	1	0
66	M16.0	M17.0				0	1	1	0	1	2	1	3	3	3	3	3	1	4	0	0	3	1	3	1	3	2	1	3	3	2	1	3	1	3	3	3	5	Harghita	Sandominic	1	70	2	3	0	0	0	1	0
67	M16.0					1	1	1	0	1	5	1	4	3	3	1	-	-	3	0	0	2	-	-	-	-	-	-	-	-	-	-	-	-	-	1	2	3	Satu Mare	Carei	2	79	1	3	0	0	0	0	0
68	M79.08					0	0	1	0	1	1	1	4	2	2	4	4	0	4	0	0	4	3	3	1	3	2	1	3	3	2	1	3	2	3	3	4	5	Mures	Santana de Mures	1	81	1	3	0	0	0	1	0
69						0	0	0	0	1	5	1	2	1	1	3	3	1	4	0	0	4	2	3	0	3	1	0	3	3	1	0	3	1	3	1	3	3	Harghita	Lunca de Jos	1	66	2	3	0	0	0	1	0
70	M47.90	M17.0				1	0	1	0	1	15	0	4	4	4	0	-	-	-	-	-	-	-	-	-	-	-	-	-	-	-	-	-	-	-	-	-	-	Mures	Solocma	1	58	1	3	0	0	0	1	0
71	M47.90					1	1	1	0	1	16	0	4	4	4	4	4	0	4	0	0	3	2	3	1	3	2	1	3	3	2	1	3	1	3	3	4	5	Mures	Solocma	1	59	2	3	0	0	0	0	0
72	M47.90					1	0	0	0	0	33	0	4	3	3	3	4	1	4	0	0	3	1	3	0	3	1	0	2	3	1	0	3	1	3	2	1	5	Harghita	Gheorgheni	2	71	1	3	0	0	0	1	0
73	M47.90	M75.8	M77.0			1	0	0	1	1	10	1	4	4	4	4	4	0	4	0	0	3	1	3	0	3	1	0	3	3	1	0	3	1	3	3	4	3	Harghita	Gheorgheni	2	73	2	3	0	1	0	1	0
74	M47.90	M53.1				1	0	0	1	1	18	1	4	3	3	4	4	0	4	0	0	4	1	3	0	3	1	0	3	3	1	0	3	2	3	2	1	-	Mures	Ghindor	1	69	1	4	0	0	0	1	0
75	M79.08					1	0	1	0	1	4	1	3	3	3	2	-	-	-	-	-	-	-	-	-	-	-	-	-	-	-	-	-	-	-	-	-	-	Harghita	Baile Tusnad	2	69	1	3	0	0	0	1	0
76	M54.4	M75.8				1	1	0	1	1	15	1	4	3	3	3	4	1	4	0	0	3	1	3	0	3	2	1	3	3	2	1	3	1	3	4	0	-	Covasna	Sfantu Gheorghe	2	69	2	3	0	1	0	1	0
77	M17.0					1	0	0	0	1	10	1	4	5	5	0	-	-	-	-	-	-	-	-	-	-	-	-	-	-	-	-	-	-	-	-	-	-	Covasna	Sfantu Gheorghe	2	64	1	5	0	0	0	1	0
78	M47.90	M16.0	M17.0			1	0	1	0	0	24	1	3	3	3	4	4	0	4	0	0	4	1	3	1	3	2	1	3	3	2	1	3	2	3	3	3	5	Harghita	Danesti	1	68	1	4	0	0	0	1	0
79	M16.0					1	1	0	0	0	19	0	3	3	3	0	-	-	-	-	-	-	-	-	-	-	-	-	-	-	-	-	-	-	-	-	-	-	Harghita	Miercurea Ciuc	2	67	1	3	0	0	0	1	0
80	M54.4	M75.8				1	0	0	1	1	3	0	4	3	3	4	4	0	4	0	0	3	1	3	1	3	2	1	3	3	2	1	3	2	3	4	3	5	Harghita	Ciceu	1	47	1	5	0	0	0	1	0
81	M16.0	M17.0				1	0	1	1	0	10	1	2	3	3	4	4	0	4	0	0	3	1	3	0	3	1	0	3	3	1	0	3	1	3	3	1	-	Harghita	Ciceu	1	67	1	5	0	1	0	1	0
82	M43.86					1	0	0	1	1	1	1	4	3	3	1	-	-	-	-	-	-	-	-	-	-	-	-	-	-	-	-	-	-	-	-	-	-	Harghita	Sandominic	1	61	2	3	0	1	0	1	0
83	M47.92					1	0	1	0	1	10	0	3	4	4	3	4	0	4	0	0	3	0	2	0	3	0	0	2	2	0	0	1	3	0	2	4	4	Neamt	Pangarati	1	51	1	3	0	0	0	1	1
84	M13.0					1	0	0	0	1	30	0	3	4	4	1	2	2	3	0	0	3	0	3	0	2	1	0	2	1	1	1	2	2	1	2	3	4	Neamt	Piatra Neamt	2	44	1	4	0	0	1	1	0
85	M16.0	M17.0				0	1	1	0	1	6	0	2	4	3	3	3	0	4	0	0	3	0	2	0	2	0	2	2	3	0	0	3	0	3	3	3	3	Neamt	Piatra Neamt	2	47	2	3	0	0	0	1	1
[truncated: 4 more columns]
