# Supplementary material for: Perceived Influence of Weather Conditions on Rheumatic Pain in Romania
Source: Hindawi journal article supplement (doi:10.1155/2019/9187105), 2019-06-10
Supplement: f1 [file 9187105.f1.zip › 9187105.f1/SM_3_AMETE_2777779.xlsx]

## Sheet: Sheet1
THE PERCEIVED INFLUENCE OF WEATHER CONDITIONS ON RHEUMATIC PAIN IN ROMANIA
Advances in Meteorology
Adina-Eliza Croitoru*, Gabriela Dogaru, Titus Cristian Man, Simona Mălăescu, Marieta Motricală, Andreea-Sabina Scripcă,
* Babeș-Bolyai University, Faculty of Geography: adina.croitoru@ubbcluj.ro; adina04@yahoo.com.
		Q02_vertebral_column	Q02_hips	Q02_knees	Q02_hands	Q02_other	Q03	Q04	Q05	Q06	Q07	Q08	Q09_bw	Q09_fw	Q10q1	Q10q2	Q10q3	Q10q4	Q11q1	Q11q2	Q11q3	Q11q4	Q11q5	Q11q6	Q11q7	Q11q8	Q11q9	Q11q10	Q11q11	Q11q12	Q11q13	Q12	Q13	Q14	Q15	Q16	Q17	Q18	Q19_alcohol_regularly	Q19_alcohol_occasional	Q19_ex_alcohol	Q19_coffee	Q19_tobacco	Q19_tobacco_occasional	Q19_ex_tobacco	Q20	Q21
Q02_vertebral_column	Pearson Correlation	1	-.169**	-.163**	-0.017633	0.0686803	0.025538	-.140**	0.0614191	.155**	.167**	.153**	0.0628676	-0.0390817	0.00480731	0.0372354	0.0527436	-0.0113451	.118*	-0.0138918	0.0331759	0.00403667	.155**	0.0210586	0.00602852	0.0397712	0.0942988	-0.00501729	.136*	0.0624045	0.0022009	0.017082	0.0819771	-0.10989	0.0471188	-.170**	-.135**	-0.00569015	0.045239	-0.0767138	0.0359242	0.0414855	-0.0596486	0.013403	-0.0477308	0.0483479	-0.0135326
	Sig. (2-tailed)		0.000779783	0.00115772	0.727485	0.174209	0.616019	0.00558916	0.225612	0.00205756	0.000955244	0.00367271	0.269802	0.492974	0.9326	0.512278	0.353125	0.841797	0.0401573	0.80938	0.564468	0.94412	0.00675421	0.714591	0.916631	0.489659	0.100789	0.930576	0.0180928	0.278084	0.969516	0.764136	0.148563	0.0714245	0.351525	0.000712922	0.00719924	0.910471	0.372319	0.129952	0.478753	0.413329	0.239297	0.791632	0.346535	0.340329	0.789665
	N	393	393	393	393	393	388	393	391	391	390	360	310	310	312	312	312	312	304	304	304	304	304	304	304	304	304	304	304	304	304	311	312	270	393	393	393	393	391	391	391	391	391	391	391	391	391
Q02_hips	Pearson Correlation	-.169**	1	.133**	-0.017406	-0.064016	0.0520265	-0.0409638	0.0766508	0.0343399	0.0367766	-0.00930684	0.0580833	-0.0522657	0.045002	0.0662169	0.0125061	0.0365161	0.0117198	0.0174495	.151**	0.0720742	-.119*	0.0756602	0.0174495	0.0782021	-0.0313497	.147*	0.0713525	0.0966917	-0.0310339	-0.0588354	0.0896532	-0.0384582	0.0580441	0.0228606	-0.00767974	-0.0526613	-0.0525054	0.0418533	-0.0909369	0.0776348	0.0631597	-0.0712461	0.063513	0.094866	0.0346351
	Sig. (2-tailed)	0.000779783		0.00807627	0.730855	0.205397	0.306691	0.418039	0.130268	0.498372	0.468948	0.860314	0.308017	0.359068	0.4283	0.24353	0.825853	0.520466	0.83874	0.761881	0.00820545	0.210166	0.0388273	0.188297	0.761881	0.173841	0.58611	0.0105049	0.214779	0.0923988	0.58989	0.301	0.114011	0.529197	0.250976	0.651406	0.879374	0.297705	0.300381	0.409197	0.0724743	0.125392	0.21271	0.159701	0.210158	0.06092	0.494684
	N	393	393	393	393	393	388	393	391	391	390	360	310	310	312	312	312	312	304	304	304	304	304	304	304	304	304	304	304	304	304	311	312	270	393	393	393	393	391	391	391	391	391	391	391	391	391
Q02_knees	Pearson Correlation	-.163**	.133**	1	-0.0237096	-0.047458	0.0649885	0.0752518	0.0719707	.138**	.144**	-0.0672211	0.00778582	-0.0727372	0.0107555	-0.0640883	-0.0907806	-0.0480458	0.0553661	0.0266111	0.0518031	0.0541622	0.0977095	0.0590327	0.0266111	0.0313764	.142*	0.0702807	-0.0165968	-0.0841732	-0.0497959	-0.0731145	-0.0377659	-0.0222652	0.0385152	-0.0044004	-0.0724989	-0.0308521	-0.0407595	-0.039088	-.106*	0.0549049	-0.0449277	-0.0372166	-0.032566	.127*	-0.0177502
	Sig. (2-tailed)	0.00115772	0.00807627		0.639361	0.348064	0.201481	0.136443	0.155487	0.0063918	0.00439979	0.203219	0.891401	0.201536	0.849918	0.259049	0.109516	0.397697	0.335998	0.643973	0.368066	0.346628	0.0890037	0.304927	0.643973	0.58579	0.0130141	0.221764	0.773191	0.143149	0.386939	0.198472	0.506281	0.715706	0.446427	0.930706	0.151417	0.541984	0.421559	0.440864	0.0357966	0.278801	0.375623	0.463066	0.520835	0.0117133	0.72642
	N	393	393	393	393	393	388	393	391	391	390	360	310	310	312	312	312	312	304	304	304	304	304	304	304	304	304	304	304	304	304	311	312	270	393	393	393	393	391	391	391	391	391	391	391	391	391
Q02_hands	Pearson Correlation	-0.017633	-0.017406	-0.0237096	1	.124*	-0.00122871	-0.0289102	.109*	0.0379716	0.0389921	0.0863335	-0.000492261	0.022223	0.0480091	-0.0304973	-0.0431992	-0.0107729	-.117*	0.0412782	-0.0810923	0.00508205	-0.0754422	-0.0721782	0.0629885	-0.0165516	-0.0583146	-0.0854975	-0.0298031	-0.111274	-0.0272848	0.0780311	-0.0287039	-0.0226108	-0.0434914	-0.0147516	-0.0760941	0.0628092	0.0850692	0.0418478	-0.079071	.127*	0.0194399	-0.0221743	-0.0531094	0.0190672	-0.00822016
	Sig. (2-tailed)	0.727485	0.730855	0.639361		0.0136121	0.980753	0.567718	0.0304384	0.454034	0.442575	0.101961	0.993113	0.696726	0.398059	0.591508	0.44705	0.849679	0.040863	0.473343	0.158424	0.929683	0.189577	0.209507	0.273602	0.773793	0.310858	0.13694	0.604731	0.0526037	0.635603	0.169862	0.613503	0.711489	0.389875	0.770651	0.132096	0.214087	0.092997	0.409258	0.118532	0.0122189	0.701567	0.662025	0.294847	0.707023	0.871286
	N	393	393	393	393	393	388	393	391	391	390	360	310	310	312	312	312	312	304	304	304	304	304	304	304	304	304	304	304	304	304	311	312	270	393	393	393	393	391	391	391	391	391	391	391	391	391
Q02_other	Pearson Correlation	0.0686803	-0.064016	-0.047458	.124*	1	0.0776063	-0.0291335	.194**	.113*	.121*	0.0774112	-0.0611043	-0.051447	0.0193327	0.0262322	0.0371577	-0.101347	0.0711089	-0.0367419	0.000681027	0.0761223	0.0697006	0.00356809	0.083103	0.0731951	0.0431334	-0.0431289	0.0486712	0.0119518	.162**	0.0501184	0.104416	0.0384294	-.118*	-0.0746114	-0.0299527	-0.0601834	0.0309705	-0.0581192	-0.0129169	-0.0179466	-0.00716693	0.0159935	-.104*	0.0579668	-.142**
	Sig. (2-tailed)	0.174209	0.205397	0.348064	0.0136121		0.127001	0.564729	0.000112347	0.0253506	0.0170905	0.142684	0.283491	0.366655	0.733747	0.644388	0.513159	0.073846	0.216353	0.523347	0.990565	0.185606	0.225612	0.950598	0.148322	0.203142	0.453672	0.45372	0.397767	0.835591	0.00466364	0.378403	0.065477	0.529505	0.0197049	0.139821	0.55383	0.233902	0.541472	0.251579	0.799025	0.723516	0.887661	0.752565	0.0402786	0.252826	0.005018
	N	393	393	393	393	393	388	393	391	391	390	360	310	310	312	312	312	312	304	304	304	304	304	304	304	304	304	304	304	304	304	311	312	270	393	393	393	393	391	391	391	391	391	391	391	391	391
Q03	Pearson Correlation	0.025538	0.0520265	0.0649885	-0.00122871	0.0776063	1	0.0528828	0.0809814	.108*	.108*	0.0988373	0.0960764	-0.0898527	.121*	0.0095523	-0.00192165	-0.0481181	.122*	0.0172675	-0.0143074	0.079228	-0.00650333	0.0195973	0.067904	0.0166006	0.0409979	0.0814521	.118*	0.0897387	0.0794314	0.0647353	0.108758	0.108412	0.0979591	.248**	-0.0598724	-0.0595703	0.0795712	-0.0532868	0.0169111	0.0896394	-.109*	0.0212201	0.00917287	0.0385466	-.136**
	Sig. (2-tailed)	0.616019	0.306691	0.201481	0.980753	0.127001		0.298787	0.111246	0.0339541	0.0329193	0.0617446	0.0912819	0.114377	0.032799	0.866541	0.973031	0.396987	0.033703	0.764291	0.803792	0.168245	0.910091	0.733618	0.237828	0.773141	0.476355	0.15658	0.0393295	0.11844	0.167153	0.25503	0.0549798	0.0753435	0.0538572	7.47087e-07	0.239355	0.241738	0.118587	0.296362	0.740495	0.0785834	0.0326726	0.6777	0.857437	0.450162	0.00764252
	N	388	388	388	388	388	388	388	388	388	387	358	310	310	312	312	312	312	304	304	304	304	304	304	304	304	304	304	304	304	304	311	312	270	388	388	388	388	386	386	386	386	386	386	386	386	386
Q04	Pearson Correlation	-.140**	-0.0409638	0.0752518	-0.0289102	-0.0291335	0.0528828	1	-0.00671817	-0.0486628	-0.032828	0.0857888	0.058551	-5.71098e-05	0.06943	0.0265212	0.0375671	0.0330252	.158**	0.0753149	0.000410172	0.0688466	0.00195604	-0.0854308	0.0753149	0.0371524	-0.0299458	-0.0388559	-0.062156	0.0295697	-0.0142551	-0.00069857	-0.0385559	-0.0905	.118*	.228**	-0.0263506	0.0396275	0.0306247	-0.00186596	-0.0141751	0.0405848	-0.00923579	-0.0344609	0.0622985	0.056751	0.000196388
	Sig. (2-tailed)	0.00558916	0.418039	0.136443	0.567718	0.564729	0.298787		0.894653	0.33719	0.518024	0.104149	0.304131	0.999201	0.221355	0.640743	0.508524	0.561134	0.00585212	0.190327	0.994317	0.231363	0.972906	0.137248	0.190327	0.518714	0.603002	0.499714	0.280005	0.607565	0.804494	0.99021	0.497422	0.138018	0.0193698	4.6924e-06	0.602037	0.43281	0.545483	0.970624	0.779654	0.422957	0.855364	0.496306	0.218433	0.262318	0.996908
	N	393	393	393	393	393	388	394	391	391	390	360	310	310	312	312	312	312	304	304	304	304	304	304	304	304	304	304	304	304	304	311	312	270	394	394	394	394	392	392	392	392	392	392	392	392	392
Q05	Pearson Correlation	0.0614191	0.0766508	0.0719707	.109*	.194**	0.0809814	-0.00671817	1	.326**	.327**	0.099653	.135*	-0.0164859	-0.0441686	-0.0301483	0.00522289	-.172**	0.11108	0.0924026	0.0843406	0.0598751	0.0998696	.114*	0.070778	0.0506884	0.0689153	0.0987995	.145*	.129*	0.0521144	0.0819012	0.04579	-0.0439931	0.00461791	-0.0139634	-.107*	-0.0253562	0.0421255	-0.0463497	0.0110094	0.0452299	-.132**	-0.045749	0.0456771	0.0306762	-0.0711608
	Sig. (2-tailed)	0.225612	0.130268	0.155487	0.0304384	0.000112347	0.111246	0.894653		3.69936e-11	3.68783e-11	0.0589037	0.0175548	0.772497	0.43691	0.59576	0.926789	0.00226877	0.0530208	0.107857	0.142353	0.298065	0.0821296	0.0469516	0.218504	0.378476	0.230896	0.0854795	0.0114009	0.0245661	0.365191	0.149599	0.420249	0.471601	0.927476	0.783134	0.0347736	0.617172	0.407366	0.361923	0.828639	0.37365	0.00916809	0.368184	0.368939	0.54636	0.161283
	N	391	391	391	391	391	388	391	391	391	390	360	310	310	312	312	312	312	304	304	304	304	304	304	304	304	304	304	304	304	304	311	312	270	391	391	391	391	389	389	389	389	389	389	389	389	389
Q06	Pearson Correlation	.155**	0.0343399	.138**	0.0379716	.113*	.108*	-0.0486628	.326**	1	.976**	.135*	.145*	-.120*	0.0206364	-0.018483	-0.026181	-0.0871306	0.0783308	-0.0356111	.194**	0.0575226	.120*	.265**	-0.00741897	-0.0512986	0.0639787	.189**	.125*	0.104518	-0.037767	.139*	0.0523735	-0.0616361	.190**	-.228**	-.125*	0.0723371	0.0078373	0.0154968	0.0726644	0.0611553	0.075722	-0.00550907	0.0774976	0.0654654	.150**
	Sig. (2-tailed)	0.00205756	0.498372	0.0063918	0.454034	0.0253506	0.0339541	0.33719	3.69936e-11		1.27278e-260	0.0104393	0.0103376	0.0342691	0.71654	0.745036	0.645034	0.124593	0.173131	0.53622	0.000683811	0.317486	0.0366877	2.8698e-06	0.897498	0.372755	0.266116	0.000944802	0.0290924	0.0687881	0.511817	0.0142659	0.356518	0.312953	0.000161855	5.1494e-06	0.0130181	0.153389	0.877546	0.760611	0.152589	0.228815	0.136012	0.913752	0.127043	0.197605	0.00311685
	N	391	391	391	391	391	388	391	391	391	390	360	310	310	312	312	312	312	304	304	304	304	304	304	304	304	304	304	304	304	304	311	312	270	391	391	391	391	389	389	389	389	389	389	389	389	389
Q07	Pearson Correlation	.167**	0.0367766	.144**	0.0389921	.121*	.108*	-0.032828	.327**	.976**	1	.139**	.147**	-.122*	0.0188908	-0.0196656	-0.0278563	-0.0912066	0.0732416	-0.0176572	.195**	0.076252	.124*	.245**	0.0105757	-0.0484978	0.0596388	.188**	.123*	.135*	-0.0482089	.115*	0.0630954	-0.0433	.180**	-.219**	-.139**	0.0633378	0.0067775	0.00615094	0.0976353	0.0677459	0.0713328	-0.00770465	0.0700868	0.0726699	.131**
	Sig. (2-tailed)	0.000955244	0.468948	0.00439979	0.442575	0.0170905	0.0329193	0.518024	3.68783e-11	1.27278e-260		0.00855073	0.0097471	0.0317215	0.740017	0.729761	0.624581	0.108424	0.203605	0.759521	0.000643603	0.185585	0.0312102	1.59439e-05	0.854536	0.400235	0.300782	0.00103754	0.0317864	0.0188967	0.403051	0.0425162	0.26729	0.479444	0.000340229	1.32713e-05	0.00602542	0.212009	0.894136	0.903873	0.0546586	0.18297	0.160812	0.879757	0.168268	0.15309	0.00994245
	N	390	390	390	390	390	387	390	390	390	390	359	309	309	311	311	311	311	303	303	303	303	303	303	303	303	303	303	303	303	303	310	311	269	390	390	390	390	388	388	388	388	388	388	388	388	388
Q08	Pearson Correlation	.153**	-0.00930684	-0.0672211	0.0863335	0.0774112	0.0988373	0.0857888	0.099653	.135*	.139**	1	.365**	-.299**	.282**	-0.0592182	-0.0132207	.170**	0.111928	0.0144553	-0.0232084	.164**	0.0881883	0.0133839	.196**	0.0668412	.157**	-0.0189416	.244**	.138*	.186**	.186**	.345**	.134*	-.146**	-0.0673906	-.136**	0.0862919	0.0330688	-0.0185114	-0.0563286	0.0654614	-0.0539271	0.0647061	0.0377538	0.0159032	-.160**
	Sig. (2-tailed)	0.00367271	0.860314	0.203219	0.101961	0.142684	0.0617446	0.104149	0.0589037	0.0104393	0.00855073		3.70847e-11	9.29616e-08	4.29208e-07	0.298645	0.816659	0.0026277	0.0516074	0.802127	0.687411	0.00427246	0.12559	0.816522	0.000590976	0.246055	0.00603671	0.742624	1.7605e-05	0.0158652	0.0011196	0.00104225	4.41194e-10	0.0280469	0.00559902	0.202079	0.00980833	0.102127	0.532842	0.727047	0.287825	0.216614	0.308906	0.221975	0.476409	0.764277	0.00243404
	N	360	360	360	360	360	358	360	360	360	359	360	308	308	310	310	310	310	303	303	303	303	303	303	303	303	303	303	303	303	303	309	310	270	360	360	360	360	358	358	358	358	358	358	358	358	358
Q09_bw	Pearson Correlation	0.0628676	0.0580833	0.00778582	-0.000492261	-0.0611043	0.0960764	0.058551	.135*	.145*	.147**	.365**	1	-.453**	.353**	0.0303264	0.0429578	.172**	0.00939832	.127*	-0.018395	.265**	0.0135774	0.0104233	.127*	.208**	0.0670266	0.0103123	.287**	.258**	.172**	.132*	.252**	0.116998	-0.0130407	0.0286725	-0.0565566	0.0384725	0.0388916	0.00272663	-.176**	0.00700601	-0.05711	0.0390829	-0.0256556	0.0698702	-.138*
	Sig. (2-tailed)	0.269802	0.308017	0.891401	0.993113	0.283491	0.0912819	0.304131	0.0175548	0.0103376	0.0097471	3.70847e-11		4.0026e-17	1.72657e-10	0.595383	0.451801	0.002375	0.870579	0.0269421	0.749799	2.83527e-06	0.813918	0.856609	0.0269421	0.000275246	0.244744	0.85812	3.57718e-07	5.40969e-06	0.00262538	0.0202643	7.164e-06	0.055753	0.819111	0.615038	0.320928	0.499745	0.496487	0.961989	0.00194703	0.902537	0.317787	0.49437	0.653795	0.221433	0.0152663
	N	310	310	310	310	310	310	310	310	310	309	308	310	310	309	309	309	309	303	303	303	303	303	303	303	303	303	303	303	303	303	308	309	268	310	310	310	310	308	308	308	308	308	308	308	308	308
Q09_fw	Pearson Correlation	-0.0390817	-0.0522657	-0.0727372	0.022223	-0.051447	-0.0898527	-5.71098e-05	-0.0164859	-.120*	-.122*	-.299**	-.453**	1	-.208**	-0.0337896	-0.0478634	-.169**	-0.111693	-0.0365812	-.140*	-0.0558556	0.0562724	-0.0812752	-0.0755412	-0.0970532	0.0292705	-0.0930532	-.169**	-.234**	-0.0359105	-0.0270822	-.175**	0.0256185	-0.0630772	-0.0533918	0.0447719	-0.0126624	-0.0429463	-0.026888	.188**	0.0600473	-0.0596844	0.0484769	0.0394144	0.0101931	-0.0137885
	Sig. (2-tailed)	0.492974	0.359068	0.201536	0.696726	0.366655	0.114377	0.999201	0.772497	0.0342691	0.0317215	9.29616e-08	4.0026e-17		0.000236288	0.554032	0.401787	0.00289262	0.0521049	0.525855	0.0149679	0.33254	0.328939	0.158175	0.18973	0.0917196	0.611797	0.105969	0.00325642	4.02705e-05	0.533477	0.635896	0.00197437	0.676312	0.268205	0.348794	0.43216	0.824273	0.452661	0.638321	0.000939224	0.293494	0.296426	0.396546	0.490713	0.858593	0.809544
	N	310	310	310	310	310	310	310	310	310	309	308	310	310	309	309	309	309	303	303	303	303	303	303	303	303	303	303	303	303	303	308	309	268	310	310	310	310	308	308	308	308	308	308	308	308	308
Q10q1	Pearson Correlation	0.00480731	0.045002	0.0107555	0.0480091	0.0193327	.121*	0.06943	-0.0441686	0.0206364	0.0188908	.282**	.353**	-.208**	1	-0.097556	-0.0519584	.461**	-0.0113724	0.0991599	-0.0346623	.180**	-0.0187858	-0.0267442	0.0794833	.180**	0.0317461	-0.000923984	.187**	.157**	.136*	-0.0388676	.301**	0.0973482	-0.0388281	0.064619	0.0347493	-0.0809085	-0.00824668	0.0579681	-0.0757862	-0.0180279	-0.013591	-0.029079	0.00773346	-0.0224929	0.0534219
	Sig. (2-tailed)	0.9326	0.4283	0.849918	0.398059	0.733747	0.032799	0.221355	0.43691	0.71654	0.740017	4.29208e-07	1.72657e-10	0.000236288		0.0853649	0.360347	8.65862e-18	0.843457	0.0843392	0.547141	0.0016279	0.744257	0.642317	0.166874	0.00164084	0.581379	0.987199	0.00104923	0.00616279	0.0177748	0.494648	5.85398e-08	0.110496	0.494388	0.255117	0.540858	0.153946	0.885016	0.308979	0.183229	0.751884	0.811618	0.610032	0.892127	0.693228	0.348522
	N	312	312	312	312	312	312	312	312	312	311	310	309	309	312	312	312	312	304	304	304	304	304	304	304	304	304	304	304	304	304	311	312	270	312	312	312	312	310	310	310	310	310	310	310	310	310
Q10q2	Pearson Correlation	0.0372354	0.0662169	-0.0640883	-0.0304973	0.0262322	0.0095523	0.0265212	-0.0301483	-0.018483	-0.0196656	-0.0592182	0.0303264	-0.0337896	-0.097556	1	.706**	-0.0151579	0.099792	0.0135832	0.035753	0.0127623	-0.0182087	0.0270687	-.145*	0.0100343	-0.0154869	0.0267807	-0.0830728	-0.0403326	-0.0548348	-0.0980577	-0.0464026	0.00413581	0.0528379	-0.00737857	0.0727076	-0.0186762	-0.00409754	-0.0318552	-0.00864666	-.148**	-0.0141243	-0.00864666	-0.0252654	-0.0111761	0.0251842
	Sig. (2-tailed)	0.512278	0.24353	0.259049	0.591508	0.644388	0.866541	0.640743	0.59576	0.745036	0.729761	0.298645	0.595383	0.554032	0.0853649		2.30243e-48	0.789714	0.082369	0.813536	0.534597	0.824617	0.751852	0.638283	0.0112351	0.861678	0.787986	0.641862	0.14847	0.483546	0.340663	0.0842635	0.414052	0.94607	0.352264	0.896717	0.200259	0.742464	0.942718	0.576336	0.87948	0.00915818	0.804374	0.87948	0.657681	0.844621	0.658712
	N	312	312	312	312	312	312	312	312	312	311	310	309	309	312	312	312	312	304	304	304	304	304	304	304	304	304	304	304	304	304	311	312	270	312	312	312	312	310	310	310	310	310	310	310	310	310
Q10q3	Pearson Correlation	0.0527436	0.0125061	-0.0907806	-0.0431992	0.0371577	-0.00192165	0.0375671	0.00522289	-0.026181	-0.0278563	-0.0132207	0.0429578	-0.0478634	-0.0519584	.706**	1	-0.021471	0.0506989	0.0192414	0.050646	0.0180785	-0.0257936	0.0383443	-0.0932466	0.0142142	-0.021938	0.0379362	-0.0395683	0.00625547	-0.0776765	-0.0439592	-0.00339633	0.0498085	-0.00567786	0.000170223	0.0201733	-0.0264547	-0.0058042	-0.0451232	-0.0122481	-0.0891714	-0.0200071	-0.0122481	-0.0357886	-0.015831	-0.0278828
	Sig. (2-tailed)	0.353125	0.825853	0.109516	0.44705	0.513159	0.973031	0.508524	0.926789	0.645034	0.624581	0.816659	0.451801	0.401787	0.360347	2.30243e-48		0.705597	0.378377	0.738279	0.378876	0.753569	0.654191	0.505382	0.104664	0.805044	0.703224	0.509926	0.491879	0.913504	0.17676	0.43983	0.952354	0.414989	0.920432	0.997611	0.722637	0.641581	0.91893	0.428554	0.829934	0.11716	0.725683	0.829934	0.530148	0.7813	0.624814
	N	312	312	312	312	312	312	312	312	312	311	310	309	309	312	312	312	312	304	304	304	304	304	304	304	304	304	304	304	304	304	311	312	270	312	312	312	312	310	310	310	310	310	310	310	310	310
Q10q4	Pearson Correlation	-0.0113451	0.0365161	-0.0480458	-0.0107729	-0.101347	-0.0481181	0.0330252	-.172**	-0.0871306	-0.0912066	.170**	.172**	-.169**	.461**	-0.0151579	-0.021471	1	0.051716	-0.00433883	-0.00355548	0.0803386	-0.101702	0.0316501	-0.0483056	-0.00537053	-0.068727	0.0693521	.148**	.159**	0.044731	0.0473617	.149**	0.051413	0.0872845	0.0419192	-0.0316683	-0.0304546	0.0376463	0.0426988	-0.0401064	-.125*	-0.0438157	-0.074263	0.0805365	-.142*	0.0928002
	Sig. (2-tailed)	0.841797	0.520466	0.397697	0.849679	0.073846	0.396987	0.561134	0.00226877	0.124593	0.108424	0.0026277	0.002375	0.00289262	8.65862e-18	0.789714	0.705597		0.368873	0.939945	0.950773	0.162341	0.0766397	0.582524	0.401325	0.925702	0.232176	0.227946	0.00963374	0.00555629	0.437107	0.405219	0.00831229	0.400102	0.123926	0.460641	0.577344	0.592027	0.509004	0.4538	0.481696	0.027156	0.442067	0.192215	0.157197	0.0123383	0.102925
	N	312	312	312	312	312	312	312	312	312	311	310	309	309	312	312	312	312	304	304	304	304	304	304	304	304	304	304	304	304	304	311	312	270	312	312	312	312	310	310	310	310	310	310	310	310	310
Q11q1	Pearson Correlation	.118*	0.0117198	0.0553661	-.117*	0.0711089	.122*	.158**	0.11108	0.0783308	0.0732416	0.111928	0.00939832	-0.111693	-0.0113724	0.099792	0.0506989	0.051716	1	-0.0155968	.333**	0.0445289	.197**	.271**	0.0350595	-0.00503546	.202**	.262**	0.0778003	.175**	-0.0167903	-0.0392956	0.0305546	-0.102843	0.092493	.114*	-0.0236248	0.000615793	0.0857317	-0.0744845	-0.0445294	0.0332673	-0.0787397	-0.0277203	.156**	0.0440679	0.041634
	Sig. (2-tailed)	0.0401573	0.83874	0.335998	0.040863	0.216353	0.033703	0.00585212	0.0530208	0.173131	0.203605	0.0516074	0.870579	0.0521049	0.843457	0.082369	0.378377	0.368873		0.786518	2.77804e-09	0.439183	0.00053444	1.58473e-06	0.542557	0.930326	0.00039196	3.71692e-06	0.176069	0.00222687	0.770621	0.494871	0.59565	0.0947834	0.107512	0.0475921	0.681606	0.991469	0.137169	0.196763	0.4407	0.564693	0.172317	0.631353	0.00655915	0.445455	0.471012
	N	304	304	304	304	304	304	304	304	304	303	303	303	303	304	304	304	304	304	304	304	304	304	304	304	304	304	304	304	304	304	304	304	265	304	304	304	304	302	302	302	302	302	302	302	302	302
Q11q2	Pearson Correlation	-0.0138918	0.0174495	0.0266111	0.0412782	-0.0367419	0.0172675	0.0753149	0.0924026	-0.0356111	-0.0176572	0.0144553	.127*	-0.0365812	0.0991599	0.0135832	0.0192414	-0.00433883	-0.0155968	1	-0.0135171	.214**	0.0112151	-0.012475	.271**	.152**	0.0976153	0.0365974	.220**	0.0526607	.120*	0.0456663	0.073549	-0.012782	-0.0573201	0.0964035	-0.0389189	-0.0590859	0.017316	0.0487006	-.162**	-0.0349866	-.133*	0.036549	0.033104	.138*	-0.108657
	Sig. (2-tailed)	0.80938	0.761881	0.643973	0.473343	0.523347	0.764291	0.190327	0.107857	0.53622	0.759521	0.802127	0.0269421	0.525855	0.0843392	0.813536	0.738279	0.939945	0.786518		0.814428	0.000164288	0.845595	0.828503	1.63324e-06	0.00799902	0.0893137	0.524983	0.000112367	0.360179	0.036299	0.427572	0.20096	0.835931	0.319195	0.0933789	0.499019	0.304491	0.76441	0.399051	0.00466303	0.544736	0.0207826	0.526909	0.566606	0.0164305	0.0592921
	N	304	304	304	304	304	304	304	304	304	303	303	303	303	304	304	304	304	304	304	304	304	304	304	304	304	304	304	304	304	304	304	304	265	304	304	304	304	302	302	302	302	302	302	302	302	302
Q11q3	Pearson Correlation	0.0331759	.151**	0.0518031	-0.0810923	0.000681027	-0.0143074	0.000410172	0.0843406	.194**	.195**	-0.0232084	-0.018395	-.140*	-0.0346623	0.035753	0.050646	-0.00355548	.333**	-0.0135171	1	-0.102773	0.0596473	.726**	-0.0302211	-0.0659257	0.0552329	.772**	-0.0627635	.286**	-.169**	0.00323237	-0.000911946	-0.0982358	.156**	-0.027509	-0.0708657	-0.0627791	0.0452663	-0.033298	-0.0424219	0.00303557	0.0534108	-0.0661046	.115*	0.0733044	0.0795391
	Sig. (2-tailed)	0.564468	0.00820545	0.368066	0.158424	0.990565	0.803792	0.994317	0.142353	0.000683811	0.000643603	0.687411	0.749799	0.0149679	0.547141	0.534597	0.378876	0.950773	2.77804e-09	0.814428		0.0735723	0.299911	5.88074e-51	0.599673	0.25181	0.337164	2.06932e-61	0.275323	3.80754e-07	0.0031848	0.955241	0.987366	0.110608	0.00639243	0.632828	0.217932	0.275203	0.433167	0.564332	0.462651	0.958103	0.35497	0.2521	0.0466083	0.20397	0.167989
	N	304	304	304	304	304	304	304	304	304	303	303	303	303	304	304	304	304	304	304	304	304	304	304	304	304	304	304	304	304	304	304	304	265	304	304	304	304	302	302	302	302	302	302	302	302	302
Q11q4	Pearson Correlation	0.00403667	0.0720742	0.0541622	0.00508205	0.0761223	0.079228	0.0688466	0.0598751	0.0575226	0.076252	.164**	.265**	-0.0558556	.180**	0.0127623	0.0180785	0.0803386	0.0445289	.214**	-0.102773	1	-.116*	-.192**	.428**	.508**	0.0418976	-0.10356	.414**	.216**	.324**	0.0323227	.137*	.197**	-.169**	0.0977452	-0.0839808	-0.0116315	0.0162692	-0.0778867	-.246**	-0.0261275	-0.0666955	-0.0300737	-0.0787741	0.0919306	-.134*
	Sig. (2-tailed)	0.94412	0.210166	0.346628	0.929683	0.185606	0.168245	0.231363	0.298065	0.317486	0.185585	0.00427246	2.83527e-06	0.33254	0.0016279	0.824617	0.753569	0.162341	0.439183	0.000164288	0.0735723		0.0437851	0.000753128	5.58212e-15	2.25757e-21	0.466724	0.0713808	5.14987e-14	0.000145723	7.23089e-09	0.574531	0.0166151	0.00127681	0.00307109	0.0888866	0.144069	0.839937	0.77827	0.177027	1.52179e-05	0.651095	0.247875	0.602663	0.172129	0.110861	0.020299
	N	304	304	304	304	304	304	304	304	304	303	303	303	303	304	304	304	304	304	304	304	304	304	304	304	304	304	304	304	304	304	304	304	265	304	304	304	304	302	302	302	302	302	302	302	302	302
Q11q5	Pearson Correlation	.155**	-.119*	0.0977095	-0.0754422	0.0697006	-0.00650333	0.00195604	0.0998696	.120*	.124*	0.0881883	0.0135774	0.0562724	-0.0187858	-0.0182087	-0.0257936	-0.101702	.197**	0.0112151	0.0596473	-.116*	1	.202**	-0.03658	0.0145618	.730**	.127*	.139*	-0.00705818	.124*	0.0829688	0.0606148	.186**	-.177**	-.121*	-0.0354336	0.0869904	-0.0228679	-0.000718063	0.0801352	0.0838874	-0.0298658	0.0288583	0.0587376	.116*	-0.0533535
	Sig. (2-tailed)	0.00675421	0.0388273	0.0890037	0.189577	0.225612	0.910091	0.972906	0.0821296	0.0366877	0.0312102	0.12559	0.813918	0.328939	0.744257	0.751852	0.654191	0.0766397	0.00053444	0.845595	0.299911	0.0437851		0.000405121	0.525181	0.800375	6.53083e-52	0.0267209	0.0152594	0.902457	0.03083	0.148981	0.292125	0.00232151	0.00196877	0.0347821	0.538255	0.130191	0.692249	0.990085	0.164814	0.145856	0.605173	0.617408	0.308965	0.0445137	0.355487
	N	304	304	304	304	304	304	304	304	304	303	303	303	303	304	304	304	304	304	304	304	304	304	304	304	304	304	304	304	304	304	304	304	265	304	304	304	304	302	302	302	302	302	302	302	302	302
Q11q6	Pearson Correlation	0.0210586	0.0756602	0.0590327	-0.0721782	0.00356809	0.0195973	-0.0854308	.114*	.265**	.245**	0.0133839	0.0104233	-0.0812752	-0.0267442	0.0270687	0.0383443	0.0316501	.271**	-0.012475	.726**	-.192**	.202**	1	-.144*	-0.103413	.138*	.829**	-0.0285104	.191**	-.156**	0.0577821	0.0507522	-0.0668156	.180**	-0.0937599	-0.0350569	-0.0633062	0.0341784	0.0540531	0.0236501	0.00335692	0.0925407	0.0721405	.144*	0.0598132	0.0881483
	Sig. (2-tailed)	0.714591	0.188297	0.304927	0.209507	0.950598	0.733618	0.137248	0.0469516	2.8698e-06	1.59439e-05	0.816522	0.856609	0.158175	0.642317	0.638283	0.505382	0.582524	1.58473e-06	0.828503	5.88074e-51	0.000753128	0.000405121		0.0117262	0.0717863	0.015952	3.66619e-78	0.620496	0.000793766	0.00642556	0.315305	0.377876	0.278476	0.00157702	0.102759	0.542586	0.271185	0.554074	0.349205	0.682284	0.953673	0.108502	0.211263	0.0124573	0.300174	0.126394
	N	304	304	304	304	304	304	304	304	304	303	303	303	303	304	304	304	304	304	304	304	304	304	304	304	304	304	304	304	304	304	304	304	265	304	304	304	304	302	302	302	302	302	302	302	302	302
Q11q7	Pearson Correlation	0.00602852	0.0174495	0.0266111	0.0629885	0.083103	0.067904	0.0753149	0.070778	-0.00741897	0.0105757	.196**	.127*	-0.0755412	0.0794833	-.145*	-0.0932466	-0.0483056	0.0350595	.271**	-0.0302211	.428**	-0.03658	-.144*	1	.474**	0.0637397	-0.0449687	.412**	.180**	.476**	0.0348712	.124*	0.043767	-.148**	0.101244	-0.0576393	0.0473706	0.017316	-0.0578761	-.359**	0.0750755	-0.0944498	-0.0240983	-0.0621094	.253**	-.195**
	Sig. (2-tailed)	0.916631	0.761881	0.643973	0.273602	0.148322	0.237828	0.190327	0.218504	0.897498	0.854536	0.000590976	0.0269421	0.18973	0.166874	0.0112351	0.104664	0.401325	0.542557	1.63324e-06	0.599673	5.58212e-15	0.525181	0.0117262		2.05e-18	0.26791	0.434672	7.2219e-14	0.00160944	1.25951e-18	0.544728	0.0307865	0.478047	0.00953789	0.0779836	0.316504	0.410511	0.76441	0.316127	1.35689e-10	0.193225	0.101376	0.6766	0.281968	8.31066e-06	0.000660104
	N	304	304	304	304	304	304	304	304	304	303	303	303	303	304	304	304	304	304	304	304	304	304	304	304	304	304	304	304	304	304	304	304	265	304	304	304	304	302	302	302	302	302	302	302	302	302
Q11q8	Pearson Correlation	0.0397712	0.0782021	0.0313764	-0.0165516	0.0731951	0.0166006	0.0371524	0.0506884	-0.0512986	-0.0484978	0.0668412	.208**	-0.0970532	.180**	0.0100343	0.0142142	-0.00537053	-0.00503546	.152**	-0.0659257	.508**	0.0145618	-0.103413	.474**	1	0.0470864	-0.102313	.342**	.159**	.386**	0.0284186	.141*	0.0979672	-.140*	0.107034	0.0173474	-0.0603303	0.0127908	-0.0920855	-.226**	-0.0312635	-0.103934	0.0269976	-0.10566	.152**	-0.0933563
	Sig. (2-tailed)	0.489659	0.173841	0.58579	0.773793	0.203142	0.773141	0.518714	0.378476	0.372755	0.400235	0.246055	0.000275246	0.0917196	0.00164084	0.861678	0.805044	0.925702	0.930326	0.00799902	0.25181	2.25757e-21	0.800375	0.0717863	2.05e-18		0.413328	0.0748784	9.1359e-10	0.0054877	2.92325e-12	0.621621	0.0140208	0.111591	0.0144321	0.0623403	0.763233	0.2944	0.824806	0.110258	7.2832e-05	0.588383	0.0712974	0.640279	0.0666998	0.00818758	0.105411
	N	304	304	304	304	304	304	304	304	304	303	303	303	303	304	304	304	304	304	304	304	304	304	304	304	304	304	304	304	304	304	304	304	265	304	304	304	304	302	302	302	302	302	302	302	302	302
Q11q9	Pearson Correlation	0.0942988	-0.0313497	.142*	-0.0583146	0.0431334	0.0409979	-0.0299458	0.0689153	0.0639787	0.0596388	.157**	0.0670266	0.0292705	0.0317461	-0.0154869	-0.021938	-0.068727	.202**	0.0976153	0.0552329	0.0418976	.730**	.138*	0.0637397	0.0470864	1	.181**	.198**	-0.046091	.169**	0.0167469	0.0641558	.205**	-.214**	-0.0736654	0.0152677	0.0648589	-0.0197439	0.00523099	-0.0385171	0.0470225	-0.0421378	-0.000811824	-0.00690368	.134*	-0.111882
	Sig. (2-tailed)	0.100789	0.58611	0.0130141	0.310858	0.453672	0.476355	0.603002	0.230896	0.266116	0.300782	0.00603671	0.244744	0.611797	0.581379	0.787986	0.703224	0.232176	0.00039196	0.0893137	0.337164	0.466724	6.53083e-52	0.015952	0.26791	0.413328		0.00156513	0.000507578	0.423283	0.00305504	0.771196	0.264792	0.000797378	0.000167143	0.200247	0.790917	0.259581	0.732559	0.927867	0.504883	0.415516	0.465657	0.98879	0.904897	0.019421	0.0520957
	N	304	304	304	304	304	304	304	304	304	303	303	303	303	304	304	304	304	304	304	304	304	304	304	304	304	304	304	304	304	304	304	304	265	304	304	304	304	302	302	302	302	302	302	302	302	302
Q11q10	Pearson Correlation	-0.00501729	.147*	0.0702807	-0.0854975	-0.0431289	0.0814521	-0.0388559	0.0987995	.189**	.188**	-0.0189416	0.0103123	-0.0930532	-0.000923984	0.0267807	0.0379362	0.0693521	.262**	0.0365974	.772**	-0.10356	.127*	.829**	-0.0449687	-0.102313	.181**	1	-0.0395344	.235**	-.146*	0.0291481	0.036208	-0.0532938	.143*	-0.00874334	-0.0589785	-0.0563527	0.0338122	0.0257264	-0.0191684	0.00332096	0.0162828	-0.00758119	.142*	0.0591725	0.0404267
	Sig. (2-tailed)	0.930576	0.0105049	0.221764	0.13694	0.45372	0.15658	0.499714	0.0854795	0.000944802	0.00103754	0.742624	0.85812	0.105969	0.987199	0.641862	0.509926	0.227946	3.71692e-06	0.524983	2.06932e-61	0.0713808	0.0267209	3.66619e-78	0.434672	0.0748784	0.00156513		0.492249	3.39837e-05	0.0109384	0.612696	0.529406	0.387548	0.0125059	0.879329	0.305372	0.327445	0.558329	0.656106	0.74007	0.954168	0.778089	0.895615	0.0134407	0.305391	0.483981
	N	304	304	304	304	304	304	304	304	304	303	303	303	303	304	304	304	304	304	304	304	304	304	304	304	304	304	304	304	304	304	304	304	265	304	304	304	304	302	302	302	302	302	302	302	302	302
Q11q11	Pearson Correlation	.136*	0.0713525	-0.0165968	-0.0298031	0.0486712	.118*	-0.062156	.145*	.125*	.123*	.244**	.287**	-.169**	.187**	-0.0830728	-0.0395683	.148**	0.0778003	.220**	-0.0627635	.414**	.139*	-0.0285104	.412**	.342**	.198**	-0.0395344	1	.441**	.535**	.137*	.222**	0.0795491	-0.0890125	-0.0164876	-0.0569562	0.0447415	0.0347034	-0.0721331	-.114*	-0.0274724	-0.0677484	-0.0110222	-0.0220685	.124*	-0.103498
	Sig. (2-tailed)	0.0180928	0.214779	0.773191	0.604731	0.397767	0.0393295	0.280005	0.0114009	0.0290924	0.0317864	1.7605e-05	3.57718e-07	0.00325642	0.00104923	0.14847	0.491879	0.00963374	0.176069	0.000112367	0.275323	5.14987e-14	0.0152594	0.620496	7.2219e-14	9.1359e-10	0.000507578	0.492249		7.08522e-16	7.3604e-24	0.0168254	9.5743e-05	0.196742	0.121462	0.774643	0.322282	0.437	0.547999	0.211311	0.0477023	0.634409	0.240472	0.848716	0.702487	0.0317498	0.0724979
	N	304	304	304	304	304	304	304	304	304	303	303	303	303	304	304	304	304	304	304	304	304	304	304	304	304	304	304	304	304	304	304	304	265	304	304	304	304	302	302	302	302	302	302	302	302	302
Q11q12	Pearson Correlation	0.0624045	0.0966917	-0.0841732	-0.111274	0.0119518	0.0897387	0.0295697	.129*	0.104518	.135*	.138*	.258**	-.234**	.157**	-0.0403326	0.00625547	.159**	.175**	0.0526607	.286**	.216**	-0.00705818	.191**	.180**	.159**	-0.046091	.235**	.441**	1	.215**	0.0702975	.216**	-0.0095372	0.0512894	0.00584792	-0.0978585	-0.0483651	0.00601834	-0.055768	0.0117408	-0.0468267	0.0207608	-0.00442335	0.0430467	.114*	0.0743242
	Sig. (2-tailed)	0.278084	0.0923988	0.143149	0.0526037	0.835591	0.11844	0.607565	0.0245661	0.0687881	0.0188967	0.0158652	5.40969e-06	4.02705e-05	0.00616279	0.483546	0.913504	0.00555629	0.00222687	0.360179	3.80754e-07	0.000145723	0.902457	0.000793766	0.00160944	0.0054877	0.423283	3.39837e-05	7.08522e-16		0.000162644	0.221654	0.000147309	0.877197	0.372842	0.91912	0.0885153	0.400745	0.917047	0.334106	0.838984	0.417462	0.719351	0.938981	0.456082	0.048557	0.197731
	N	304	304	304	304	304	304	304	304	304	303	303	303	303	304	304	304	304	304	304	304	304	304	304	304	304	304	304	304	304	304	304	304	265	304	304	304	304	302	302	302	302	302	302	302	302	302
Q11q13	Pearson Correlation	0.0022009	-0.0310339	-0.0497959	-0.0272848	.162**	0.0794314	-0.0142551	0.0521144	-0.037767	-0.0482089	.186**	.172**	-0.0359105	.136*	-0.0548348	-0.0776765	0.044731	-0.0167903	.120*	-.169**	.324**	.124*	-.156**	.476**	.386**	.169**	-.146*	.535**	.215**	1	0.0845328	.120*	.254**	-.216**	0.0975843	0.0558449	0.0943621	-0.0428432	-.144*	-.169**	-0.0156934	-0.0769453	-0.0506194	-0.0429635	.120*	-.134*
	Sig. (2-tailed)	0.969516	0.58989	0.386939	0.635603	0.00466364	0.167153	0.804494	0.365191	0.511817	0.403051	0.0011196	0.00262538	0.533477	0.0177748	0.340663	0.17676	0.437107	0.770621	0.036299	0.0031848	7.23089e-09	0.03083	0.00642556	1.25951e-18	2.92325e-12	0.00305504	0.0109384	7.3604e-24	0.000162644		0.141442	0.0358589	2.90088e-05	0.000147522	0.089416	0.331829	0.100559	0.458215	0.0122657	0.00314067	0.785924	0.182335	0.380712	0.456953	0.0368293	0.0199339
	N	304	304	304	304	304	304	304	304	304	303	303	303	303	304	304	304	304	304	304	304	304	304	304	304	304	304	304	304	304	304	304	304	265	304	304	304	304	302	302	302	302	302	302	302	302	302
Q12	Pearson Correlation	0.017082	-0.0588354	-0.0731145	0.0780311	0.0501184	0.0647353	-0.00069857	0.0819012	.139*	.115*	.186**	.132*	-0.0270822	-0.0388676	-0.0980577	-0.0439592	0.0473617	-0.0392956	0.0456663	0.00323237	0.0323227	0.0829688	0.0577821	0.0348712	0.0284186	0.0167469	0.0291481	.137*	0.0702975	0.0845328	1	0.0526305	0.107642	0.0238706	0.00771051	-0.0440772	.141*	0.0671676	0.0535314	-0.0311711	-0.00701851	0.0769458	-0.00555443	0.00103153	-0.0678834	0.0165162
	Sig. (2-tailed)	0.764136	0.301	0.198472	0.169862	0.378403	0.25503	0.99021	0.149599	0.0142659	0.0425162	0.00104225	0.0202643	0.635896	0.494648	0.0842635	0.43983	0.405219	0.494871	0.427572	0.955241	0.574531	0.148981	0.315305	0.544728	0.621621	0.771196	0.612696	0.0168254	0.221654	0.141442		0.354939	0.0774511	0.674977	0.892271	0.438602	0.0129416	0.239098	0.348319	0.585169	0.902206	0.177304	0.922533	0.985592	0.234118	0.77245
	N	311	311	311	311	311	311	311	311	311	310	309	308	308	311	311	311	311	304	304	304	304	304	304	304	304	304	304	304	304	304	311	311	270	311	311	311	311	309	309	309	309	309	309	309	309	309
Q13	Pearson Correlation	0.0819771	0.0896532	-0.0377659	-0.0287039	0.104416	0.108758	-0.0385559	0.04579	0.0523735	0.0630954	.345**	.252**	-.175**	.301**	-0.0464026	-0.00339633	.149**	0.0305546	0.073549	-0.000911946	.137*	0.0606148	0.0507522	.124*	.141*	0.0641558	0.036208	.222**	.216**	.120*	0.0526305	1	0.0755453	-.150**	0.00601024	-.197**	0.0635261	-0.00306138	-0.0824482	0.0271978	0.00890135	-0.0853864	0.0608557	0.0135969	-0.0717931	-0.0916108
	Sig. (2-tailed)	0.148563	0.114011	0.506281	0.613503	0.065477	0.0549798	0.497422	0.420249	0.356518	0.26729	4.41194e-10	7.164e-06	0.00197437	5.85398e-08	0.414052	0.952354	0.00831229	0.59565	0.20096	0.987366	0.0166151	0.292125	0.377876	0.0307865	0.0140208	0.264792	0.529406	9.5743e-05	0.000147309	0.0358589	0.354939		0.215959	0.00791176	0.915791	0.000461667	0.263259	0.957187	0.147546	0.633348	0.875959	0.133601	0.285459	0.811538	0.207464	0.107431
	N	312	312	312	312	312	312	312	312	312	311	310	309	309	312	312	312	312	304	304	304	304	304	304	304	304	304	304	304	304	304	311	312	270	312	312	312	312	310	310	310	310	310	310	310	310	310
Q14	Pearson Correlation	-0.10989	-0.0384582	-0.0222652	-0.0226108	0.0384294	0.108412	-0.0905	-0.0439931	-0.0616361	-0.0433	.134*	0.116998	0.0256185	0.0973482	0.00413581	0.0498085	0.051413	-0.102843	-0.012782	-0.0982358	.197**	.186**	-0.0668156	0.043767	0.0979672	.205**	-0.0532938	0.0795491	-0.0095372	.254**	0.107642	0.0755453	1	-.254**	-0.0227477	0.0193745	0.101598	-0.0576623	-0.0934569	-0.0590194	-0.0175487	0.0878939	-0.0590194	-0.0729943	0.0227613	-0.087611
	Sig. (2-tailed)	0.0714245	0.529197	0.715706	0.711489	0.529505	0.0753435	0.138018	0.471601	0.312953	0.479444	0.0280469	0.055753	0.676312	0.110496	0.94607	0.414989	0.400102	0.0947834	0.835931	0.110608	0.00127681	0.00232151	0.278476	0.478047	0.111591	0.000797378	0.387548	0.196742	0.877197	2.90088e-05	0.0774511	0.215959		2.33793e-05	0.709821	0.751314	0.0957153	0.347042	0.126973	0.335792	0.774905	0.151305	0.335792	0.233665	0.710694	0.15263
	N	270	270	270	270	270	270	270	270	270	269	270	268	268	270	270	270	270	265	265	265	265	265	265	265	265	265	265	265	265	265	270	270	270	270	270	270	270	268	268	268	268	268	268	268	268	268
Q15	Pearson Correlation	0.0471188	0.0580441	0.0385152	-0.0434914	-.118*	0.0979591	.118*	0.00461791	.190**	.180**	-.146**	-0.0130407	-0.0630772	-0.0388281	0.0528379	-0.00567786	0.0872845	0.092493	-0.0573201	.156**	-.169**	-.177**	.180**	-.148**	-.140*	-.214**	.143*	-0.0890125	0.0512894	-.216**	0.0238706	-.150**	-.254**	1	.126*	-0.071385	0.0333236	0.0566054	0.0492815	0.0325722	-0.020979	0.0414323	-0.0360451	.118*	-0.0514453	.327**
	Sig. (2-tailed)	0.351525	0.250976	0.446427	0.389875	0.0197049	0.0538572	0.0193698	0.927476	0.000161855	0.000340229	0.00559902	0.819111	0.268205	0.494388	0.352264	0.920432	0.123926	0.107512	0.319195	0.00639243	0.00307109	0.00196877	0.00157702	0.00953789	0.0144321	0.000167143	0.0125059	0.121462	0.372842	0.000147522	0.674977	0.00791176	2.33793e-05		0.0125949	0.157287	0.509551	0.263547	0.330454	0.520219	0.678813	0.413329	0.476707	0.0195525	0.309636	2.98891e-11
	N	393	393	393	393	393	388	394	391	391	390	360	310	310	312	312	312	312	304	304	304	304	304	304	304	304	304	304	304	304	304	311	312	270	394	394	394	394	392	392	392	392	392	392	392	392	392
Q16	Pearson Correlation	-.170**	0.0228606	-0.0044004	-0.0147516	-0.0746114	.248**	.228**	-0.0139634	-.228**	-.219**	-0.0673906	0.0286725	-0.0533918	0.064619	-0.00737857	0.000170223	0.0419192	.114*	0.0964035	-0.027509	0.0977452	-.121*	-0.0937599	0.101244	0.107034	-0.0736654	-0.00874334	-0.0164876	0.00584792	0.0975843	0.00771051	0.00601024	-0.0227477	.126*	1	.118*	-.160**	0.0460194	0.00612442	-0.0177045	-0.00897733	-.108*	-0.0857817	-0.072344	-.224**	-.162**
	Sig. (2-tailed)	0.000712922	0.651406	0.930706	0.770651	0.139821	7.47087e-07	4.6924e-06	0.783134	5.1494e-06	1.32713e-05	0.202079	0.615038	0.348794	0.255117	0.896717	0.997611	0.460641	0.0475921	0.0933789	0.632828	0.0888866	0.0347821	0.102759	0.0779836	0.0623403	0.200247	0.879329	0.774643	0.91912	0.089416	0.892271	0.915791	0.709821	0.0125949		0.0192808	0.00139687	0.363503	0.903793	0.726759	0.859369	0.0324113	0.0898681	0.152821	7.65431e-06	0.0012809
	N	393	393	393	393	393	388	394	391	391	390	360	310	310	312	312	312	312	304	304	304	304	304	304	304	304	304	304	304	304	304	311	312	270	394	394	394	394	392	392	392	392	392	392	392	392	392
Q17	Pearson Correlation	-.135**	-0.00767974	-0.0724989	-0.0760941	-0.0299527	-0.0598724	-0.0263506	-.107*	-.125*	-.139**	-.136**	-0.0565566	0.0447719	0.0347493	0.0727076	0.0201733	-0.0316683	-0.0236248	-0.0389189	-0.0708657	-0.0839808	-0.0354336	-0.0350569	-0.0576393	0.0173474	0.0152677	-0.0589785	-0.0569562	-0.0978585	0.0558449	-0.0440772	-.197**	0.0193745	-0.071385	.118*	1	-.158**	-0.0209135	.381**	0.0797532	-0.0902335	0.0155367	0.00489438	.203**	-0.0209565	.100*
	Sig. (2-tailed)	0.00719924	0.879374	0.151417	0.132096	0.55383	0.239355	0.602037	0.0347736	0.0130181	0.00602542	0.00980833	0.320928	0.43216	0.540858	0.200259	0.722637	0.577344	0.681606	0.499019	0.217932	0.144069	0.538255	0.542586	0.316504	0.763233	0.790917	0.305372	0.322282	0.0885153	0.331829	0.438602	0.000461667	0.751314	0.157287	0.0192808		0.00164899	0.679761	5.748e-15	0.11491	0.0743474	0.759111	0.923048	5.2359e-05	0.679139	0.0472099
	N	393	393	393	393	393	388	394	391	391	390	360	310	310	312	312	312	312	304	304	304	304	304	304	304	304	304	304	304	304	304	311	312	270	394	394	394	394	392	392	392	392	392	392	392	392	392
Q18	Pearson Correlation	-0.00569015	-0.0526613	-0.0308521	0.0628092	-0.0601834	-0.0595703	0.0396275	-0.0253562	0.0723371	0.0633378	0.0862919	0.0384725	-0.0126624	-0.0809085	-0.0186762	-0.0264547	-0.0304546	0.000615793	-0.0590859	-0.0627791	-0.0116315	0.0869904	-0.0633062	0.0473706	-0.0603303	0.0648589	-0.0563527	0.0447415	-0.0483651	0.0943621	.141*	0.0635261	0.101598	0.0333236	-.160**	-.158**	1	-0.0192477	-0.0526155	-.100*	0.0345626	-0.0345273	0.0405408	-0.0238855	.101*	0.0390451
	Sig. (2-tailed)	0.910471	0.297705	0.541984	0.214087	0.233902	0.241738	0.43281	0.617172	0.153389	0.212009	0.102127	0.499745	0.824273	0.153946	0.742464	0.641581	0.592027	0.991469	0.304491	0.275203	0.839937	0.130191	0.271185	0.410511	0.2944	0.259581	0.327445	0.437	0.400745	0.100559	0.0129416	0.263259	0.0957153	0.509551	0.00139687	0.00164899		0.704018	0.298745	0.0481848	0.495035	0.495475	0.42346	0.637308	0.0451175	0.440779
	N	393	393	393	393	393	388	394	391	391	390	360	310	310	312	312	312	312	304	304	304	304	304	304	304	304	304	304	304	304	304	311	312	270	394	394	394	394	392	392	392	392	392	392	392	392	392
Q19_alcohol_regularly	Pearson Correlation	0.045239	-0.0525054	-0.0407595	0.0850692	0.0309705	0.0795712	0.0306247	0.0421255	0.0078373	0.0067775	0.0330688	0.0388916	-0.0429463	-0.00824668	-0.00409754	-0.0058042	0.0376463	0.0857317	0.017316	0.0452663	0.0162692	-0.0228679	0.0341784	0.017316	0.0127908	-0.0197439	0.0338122	0.0347034	0.00601834	-0.0428432	0.0671676	-0.00306138	-0.0576623	0.0566054	0.0460194	-0.0209135	-0.0192477	1	-0.0364582	-0.00981357	0.0266775	-0.0167087	-0.00863224	0.0127147	-0.0123204	-0.0525686
	Sig. (2-tailed)	0.372319	0.300381	0.421559	0.092997	0.541472	0.118587	0.545483	0.407366	0.877546	0.894136	0.532842	0.496487	0.452661	0.885016	0.942718	0.91893	0.509004	0.137169	0.76441	0.433167	0.77827	0.692249	0.554074	0.76441	0.824806	0.732559	0.558329	0.547999	0.917047	0.458215	0.239098	0.957187	0.347042	0.263547	0.363503	0.679761	0.704018		0.471667	0.846424	0.598475	0.741565	0.864721	0.801857	0.807881	0.299177
	N	391	391	391	391	391	386	392	389	389	388	358	308	308	310	310	310	310	302	302	302	302	302	302	302	302	302	302	302	302	302	309	310	268	392	392	392	392	392	392	392	392	392	392	392	392	392
Q19_alcohol_occasional	Pearson Correlation	-0.0767138	0.0418533	-0.039088	0.0418478	-0.0581192	-0.0532868	-0.00186596	-0.0463497	0.0154968	0.00615094	-0.0185114	0.00272663	-0.026888	0.0579681	-0.0318552	-0.0451232	0.0426988	-0.0744845	0.0487006	-0.033298	-0.0778867	-0.000718063	0.0540531	-0.0578761	-0.0920855	0.00523099	0.0257264	-0.0721331	-0.055768	-.144*	0.0535314	-0.0824482	-0.0934569	0.0492815	0.00612442	.381**	-0.0526155	-0.0364582	1	-0.0872995	.120*	0.0941367	.102*	.190**	-0.0136999	0.094533
	Sig. (2-tailed)	0.129952	0.409197	0.440864	0.409258	0.251579	0.296362	0.970624	0.361923	0.760611	0.903873	0.727047	0.961989	0.638321	0.308979	0.576336	0.428554	0.4538	0.196763	0.399051	0.564332	0.177027	0.990085	0.349205	0.316127	0.110258	0.927867	0.656106	0.211311	0.334106	0.0122657	0.348319	0.147546	0.126973	0.330454	0.903793	5.748e-15	0.298745	0.471667		0.0843081	0.0171188	0.0626035	0.0427624	0.000153083	0.786859	0.0615019
	N	391	391	391	391	391	386	392	389	389	388	358	308	308	310	310	310	310	302	302	302	302	302	302	302	302	302	302	302	302	302	309	310	268	392	392	392	392	392	392	392	392	392	392	392	392	392
Q19_ex_alcohol	Pearson Correlation	0.0359242	-0.0909369	-.106*	-0.079071	-0.0129169	0.0169111	-0.0141751	0.0110094	0.0726644	0.0976353	-0.0563286	-.176**	.188**	-0.0757862	-0.00864666	-0.0122481	-0.0401064	-0.0445294	-.162**	-0.0424219	-.246**	0.0801352	0.0236501	-.359**	-.226**	-0.0385171	-0.0191684	-.114*	0.0117408	-.169**	-0.0311711	0.0271978	-0.0590194	0.0325722	-0.0177045	0.0797532	-.100*	-0.00981357	-0.0872995	1	-.128*	-0.0400091	-0.02067	.196**	-.167**	.134**
	Sig. (2-tailed)	0.478753	0.0724743	0.0357966	0.118532	0.799025	0.740495	0.779654	0.828639	0.152589	0.0546586	0.287825	0.00194703	0.000939224	0.183229	0.87948	0.829934	0.481696	0.4407	0.00466303	0.462651	1.52179e-05	0.164814	0.682284	1.35689e-10	7.2832e-05	0.504883	0.74007	0.0477023	0.838984	0.00314067	0.585169	0.633348	0.335792	0.520219	0.726759	0.11491	0.0481848	0.846424	0.0843081		0.0111902	0.429571	0.683287	9.2175e-05	0.000891475	0.00777855
	N	391	391	391	391	391	386	392	389	389	388	358	308	308	310	310	310	310	302	302	302	302	302	302	302	302	302	302	302	302	302	309	310	268	392	392	392	392	392	392	392	392	392	392	392	392	392
Q19_coffee	Pearson Correlation	0.0414855	0.0776348	0.0549049	.127*	-0.0179466	0.0896394	0.0405848	0.0452299	0.0611553	0.0677459	0.0654614	0.00700601	0.0600473	-0.0180279	-.148**	-0.0891714	-.125*	0.0332673	-0.0349866	0.00303557	-0.0261275	0.0838874	0.00335692	0.0750755	-0.0312635	0.0470225	0.00332096	-0.0274724	-0.0468267	-0.0156934	-0.00701851	0.00890135	-0.0175487	-0.020979	-0.00897733	-0.0902335	0.0345626	0.0266775	.120*	-.128*	1	0.0793589	0.0561901	0.0943702	0.0608392	-0.0291973
	Sig. (2-tailed)	0.413329	0.125392	0.278801	0.0122189	0.723516	0.0785834	0.422957	0.37365	0.228815	0.18297	0.216614	0.902537	0.293494	0.751884	0.00915818	0.11716	0.027156	0.564693	0.544736	0.958103	0.651095	0.145856	0.953673	0.193225	0.588383	0.415516	0.954168	0.634409	0.417462	0.785924	0.902206	0.875959	0.774905	0.678813	0.859369	0.0743474	0.495035	0.598475	0.0171188	0.0111902		0.116722	0.267072	0.0619526	0.229433	0.564375
	N	391	391	391	391	391	386	392	389	389	388	358	308	308	310	310	310	310	302	302	302	302	302	302	302	302	302	302	302	302	302	309	310	268	392	392	392	392	392	392	392	392	392	392	392	392	392
Q19_tobacco	Pearson Correlation	-0.0596486	0.0631597	-0.0449277	0.0194399	-0.00716693	-.109*	-0.00923579	-.132**	0.075722	0.0713328	-0.0539271	-0.05711	-0.0596844	-0.013591	-0.0141243	-0.0200071	-0.0438157	-0.0787397	-.133*	0.0534108	-0.0666955	-0.0298658	0.0925407	-0.0944498	-0.103934	-0.0421378	0.0162828	-0.0677484	0.0207608	-0.0769453	0.0769458	-0.0853864	0.0878939	0.0414323	-.108*	0.0155367	-0.0345273	-0.0167087	0.0941367	-0.0400091	0.0793589	1	-0.0351929	-0.0633101	-0.0502291	.215**
	Sig. (2-tailed)	0.239297	0.21271	0.375623	0.701567	0.887661	0.0326726	0.855364	0.00916809	0.136012	0.160812	0.308906	0.317787	0.296426	0.811618	0.804374	0.725683	0.442067	0.172317	0.0207826	0.35497	0.247875	0.605173	0.108502	0.101376	0.0712974	0.465657	0.778089	0.240472	0.719351	0.182335	0.177304	0.133601	0.151305	0.413329	0.0324113	0.759111	0.495475	0.741565	0.0626035	0.429571	0.116722		0.487196	0.211034	0.321229	1.76792e-05
	N	391	391	391	391	391	386	392	389	389	388	358	308	308	310	310	310	310	302	302	302	302	302	302	302	302	302	302	302	302	302	309	310	268	392	392	392	392	392	392	392	392	392	392	392	392	392
Q19_tobacco_occasional	Pearson Correlation	0.013403	-0.0712461	-0.0372166	-0.0221743	0.0159935	0.0212201	-0.0344609	-0.045749	-0.00550907	-0.00770465	0.0647061	0.0390829	0.0484769	-0.029079	-0.00864666	-0.0122481	-0.074263	-0.0277203	0.036549	-0.0661046	-0.0300737	0.0288583	0.0721405	-0.0240983	0.0269976	-0.000811824	-0.00758119	-0.0110222	-0.00442335	-0.0506194	-0.00555443	0.0608557	-0.0590194	-0.0360451	-0.0857817	0.00489438	0.0405408	-0.00863224	.102*	-0.02067	0.0561901	-0.0351929	1	-0.0607027	.182**	0.0024246
	Sig. (2-tailed)	0.791632	0.159701	0.463066	0.662025	0.752565	0.6777	0.496306	0.368184	0.913752	0.879757	0.221975	0.49437	0.396546	0.610032	0.87948	0.829934	0.192215	0.631353	0.526909	0.2521	0.602663	0.617408	0.211263	0.6766	0.640279	0.98879	0.895615	0.848716	0.938981	0.380712	0.922533	0.285459	0.335792	0.476707	0.0898681	0.923048	0.42346	0.864721	0.0427624	0.683287	0.267072	0.487196		0.230481	0.000300212	0.961835
	N	391	391	391	391	391	386	392	389	389	388	358	308	308	310	310	310	310	302	302	302	302	302	302	302	302	302	302	302	302	302	309	310	268	392	392	392	392	392	392	392	392	392	392	392	392	392
Q19_ex_tobacco	Pearson Correlation	-0.0477308	0.063513	-0.032566	-0.0531094	-.104*	0.00917287	0.0622985	0.0456771	0.0774976	0.0700868	0.0377538	-0.0256556	0.0394144	0.00773346	-0.0252654	-0.0357886	0.0805365	.156**	0.033104	.115*	-0.0787741	0.0587376	.144*	-0.0621094	-0.10566	-0.00690368	.142*	-0.0220685	0.0430467	-0.0429635	0.00103153	0.0135969	-0.0729943	.118*	-0.072344	.203**	-0.0238855	0.0127147	.190**	.196**	0.0943702	-0.0633101	-0.0607027	1	0.0382225	.211**
	Sig. (2-tailed)	0.346535	0.210158	0.520835	0.294847	0.0402786	0.857437	0.218433	0.368939	0.127043	0.168268	0.476409	0.653795	0.490713	0.892127	0.657681	0.530148	0.157197	0.00655915	0.566606	0.0466083	0.172129	0.308965	0.0124573	0.281968	0.0666998	0.904897	0.0134407	0.702487	0.456082	0.456953	0.985592	0.811538	0.233665	0.0195525	0.152821	5.2359e-05	0.637308	0.801857	0.000153083	9.2175e-05	0.0619526	0.211034	0.230481		0.450473	2.52264e-05
	N	391	391	391	391	391	386	392	389	389	388	358	308	308	310	310	310	310	302	302	302	302	302	302	302	302	302	302	302	302	302	309	310	268	392	392	392	392	392	392	392	392	392	392	392	392	392
Q20	Pearson Correlation	0.0483479	0.094866	.127*	0.0190672	0.0579668	0.0385466	0.056751	0.0306762	0.0654654	0.0726699	0.0159032	0.0698702	0.0101931	-0.0224929	-0.0111761	-0.015831	-.142*	0.0440679	.138*	0.0733044	0.0919306	.116*	0.0598132	.253**	.152**	.134*	0.0591725	.124*	.114*	.120*	-0.0678834	-0.0717931	0.0227613	-0.0514453	-.224**	-0.0209565	.101*	-0.0123204	-0.0136999	-.167**	0.0608392	-0.0502291	.182**	0.0382225	1	-0.0180716
	Sig. (2-tailed)	0.340329	0.06092	0.0117133	0.707023	0.252826	0.450162	0.262318	0.54636	0.197605	0.15309	0.764277	0.221433	0.858593	0.693228	0.844621	0.7813	0.0123383	0.445455	0.0164305	0.20397	0.110861	0.0445137	0.300174	8.31066e-06	0.00818758	0.019421	0.305391	0.0317498	0.048557	0.0368293	0.234118	0.207464	0.710694	0.309636	7.65431e-06	0.679139	0.0451175	0.807881	0.786859	0.000891475	0.229433	0.321229	0.000300212	0.450473		0.721328
	N	391	391	391	391	391	386	392	389	389	388	358	308	308	310	310	310	310	302	302	302	302	302	302	302	302	302	302	302	302	302	309	310	268	392	392	392	392	392	392	392	392	392	392	392	392	392
Q21	Pearson Correlation	-0.0135326	0.0346351	-0.0177502	-0.00822016	-.142**	-.136**	0.000196388	-0.0711608	.150**	.131**	-.160**	-.138*	-0.0137885	0.0534219	0.0251842	-0.0278828	0.0928002	0.041634	-0.108657	0.0795391	-.134*	-0.0533535	0.0881483	-.195**	-0.0933563	-0.111882	0.0404267	-0.103498	0.0743242	-.134*	0.0165162	-0.0916108	-0.087611	.327**	-.162**	.100*	0.0390451	-0.0525686	0.094533	.134**	-0.0291973	.215**	0.0024246	.211**	-0.0180716	1
	Sig. (2-tailed)	0.789665	0.494684	0.72642	0.871286	0.005018	0.00764252	0.996908	0.161283	0.00311685	0.00994245	0.00243404	0.0152663	0.809544	0.348522	0.658712	0.624814	0.102925	0.471012	0.0592921	0.167989	0.020299	0.355487	0.126394	0.000660104	0.105411	0.0520957	0.483981	0.0724979	0.197731	0.0199339	0.77245	0.107431	0.15263	2.98891e-11	0.0012809	0.0472099	0.440779	0.299177	0.0615019	0.00777855	0.564375	1.76792e-05	0.961835	2.52264e-05	0.721328
	N	391	391	391	391	391	386	392	389	389	388	358	308	308	310	310	310	310	302	302	302	302	302	302	302	302	302	302	302	302	302	309	310	268	392	392	392	392	392	392	392	392	392	392	392	392	392
**. Correlation is significant at the 0.01 level (2-tailed).
*. Correlation is significant at the 0.05 level (2-tailed).
